# Supplementary material for: Transcriptional Landscape and Splicing Efficiency in Arabidopsis Mitochondria
Source: MDPI journal article supplement (doi:10.3390/cells10082054), 2021-08-11

**Fig. S3.** RNA read depth of the protein-coding genes in the *Arabidopsis* mtDNA based on the combined data sets of the three biological samples. The curves plot the number of RNA reads mapped to each nucleotide position. Shown are the coding sequences of each gene (gray rectangles) and 100 bp flanking regions. For intron-containing genes, the spliced and unspliced versions of the gene are shown. The x-axis shows the coordinates of the gene.

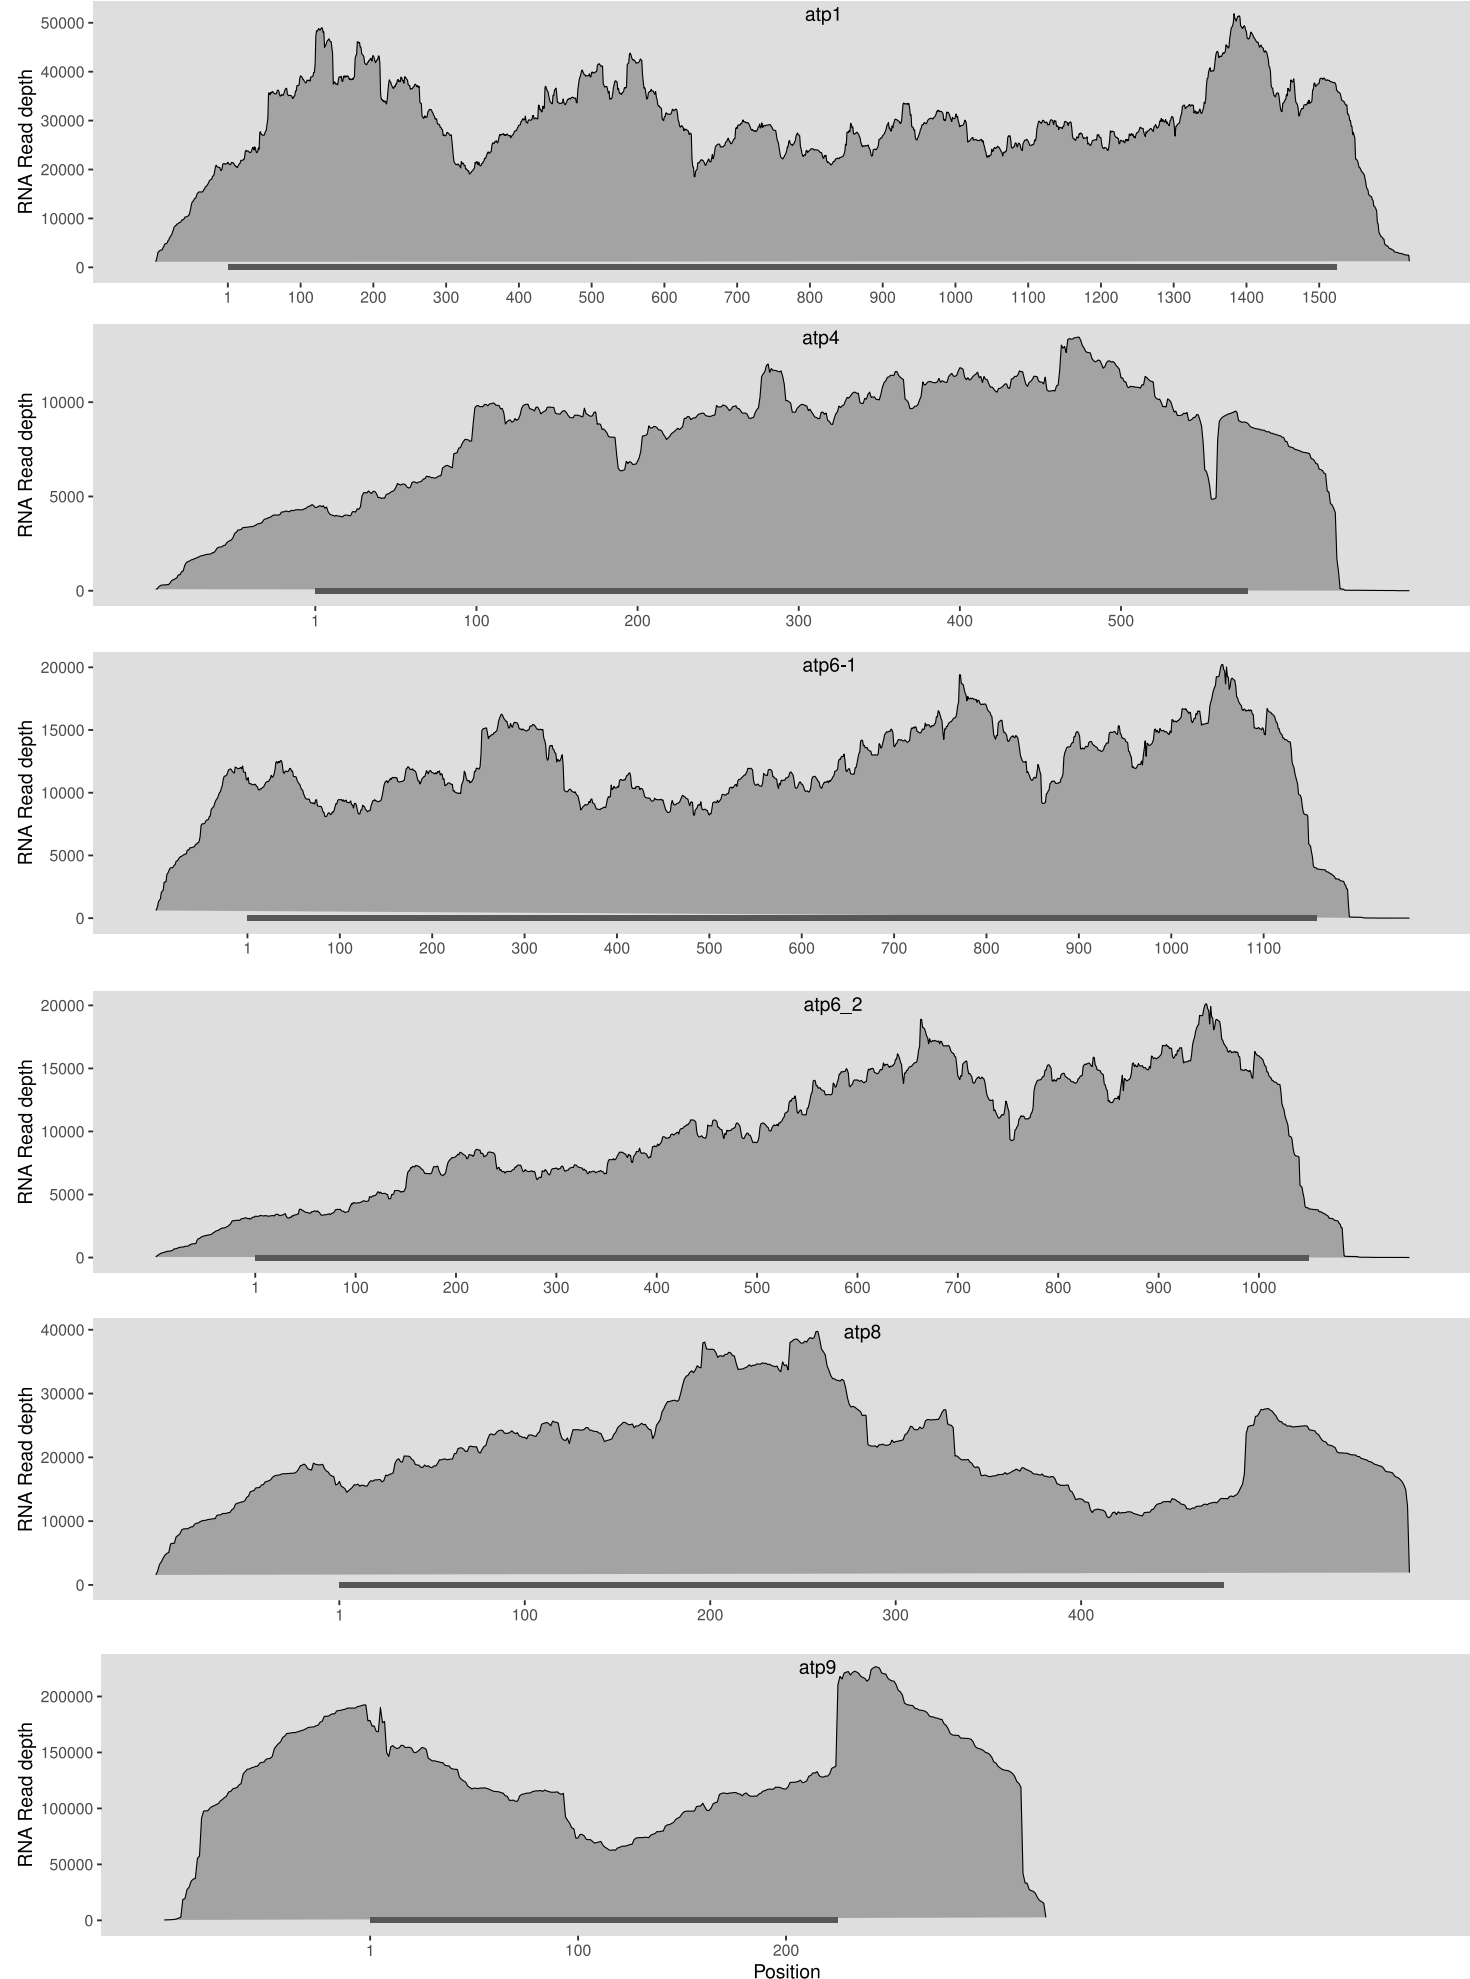

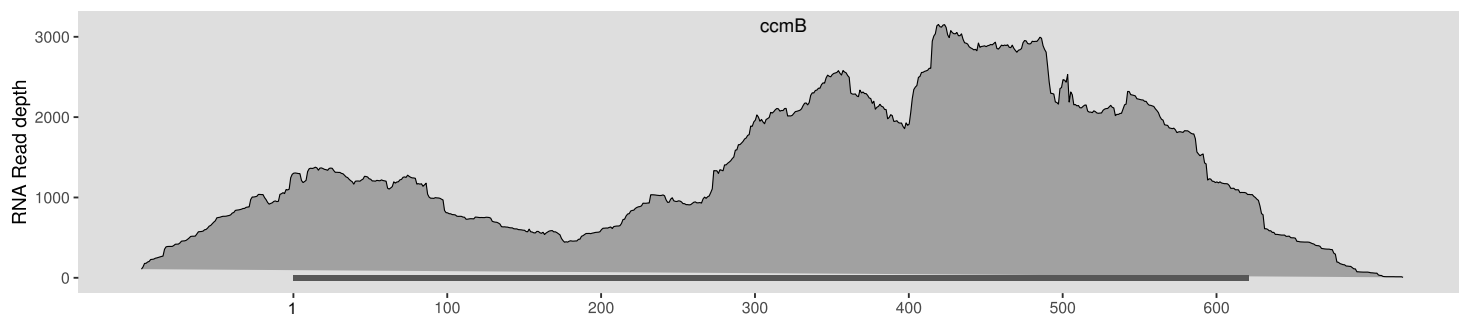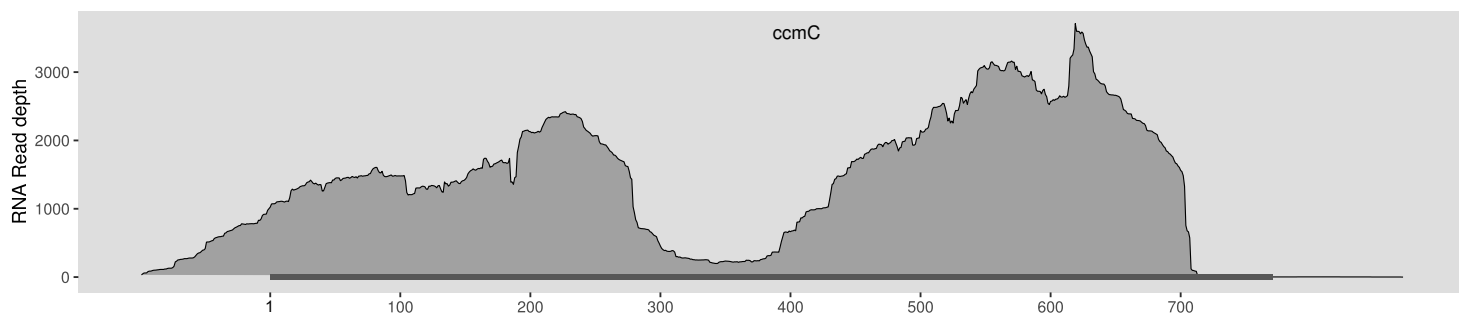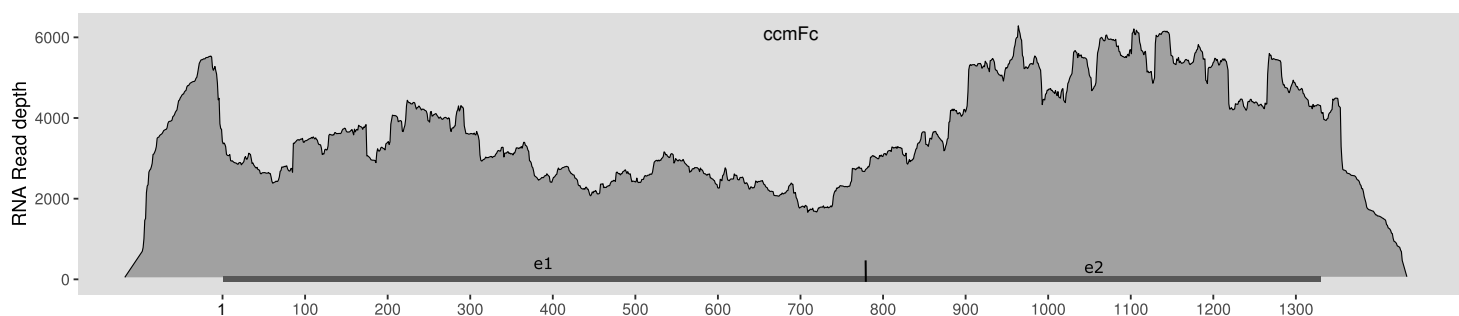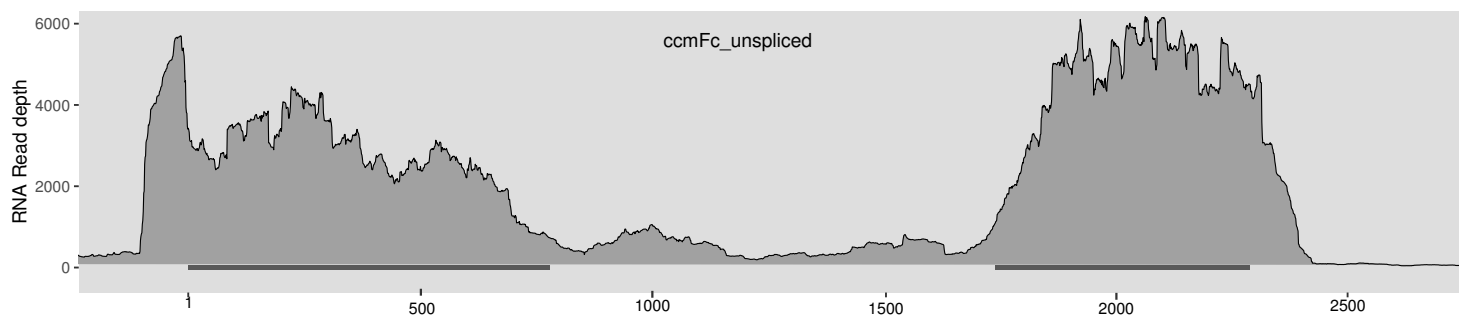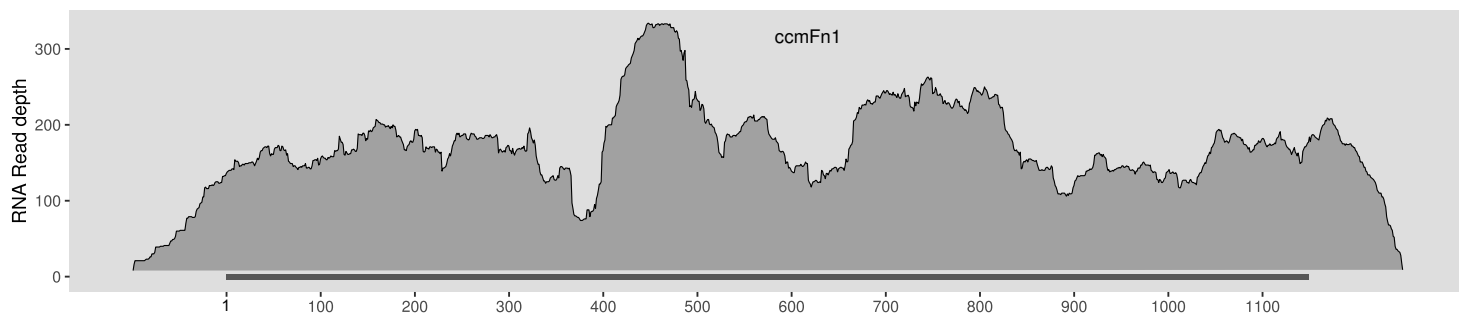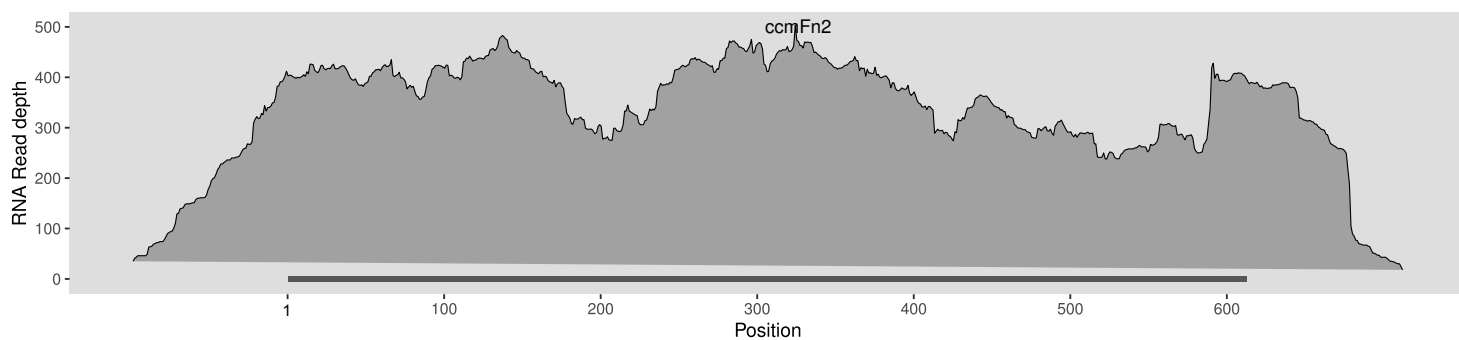

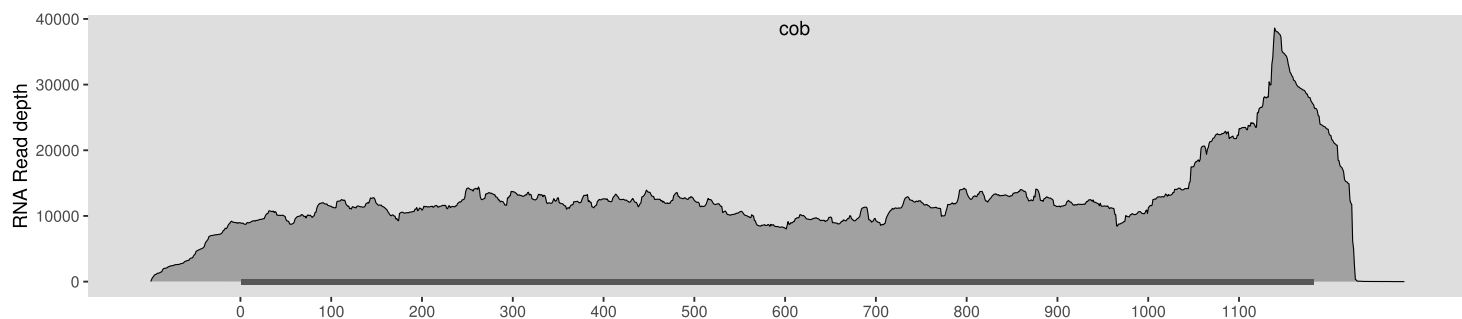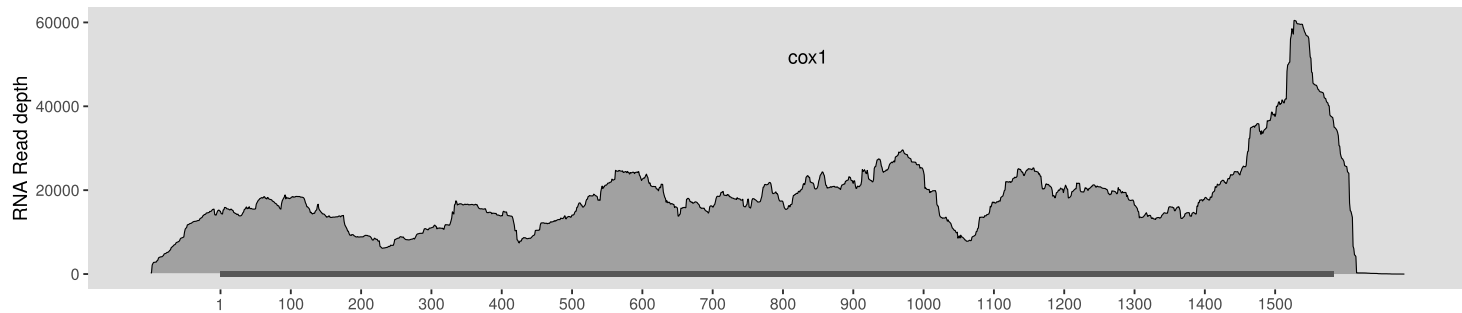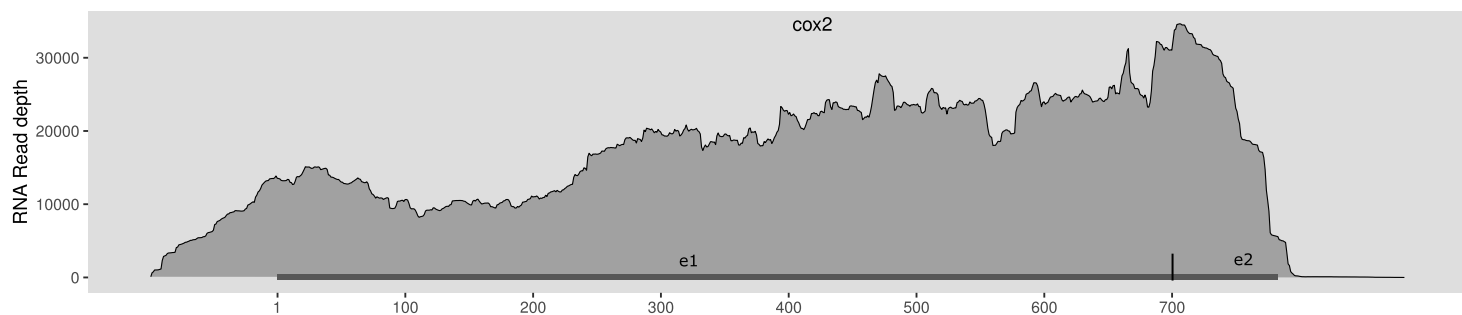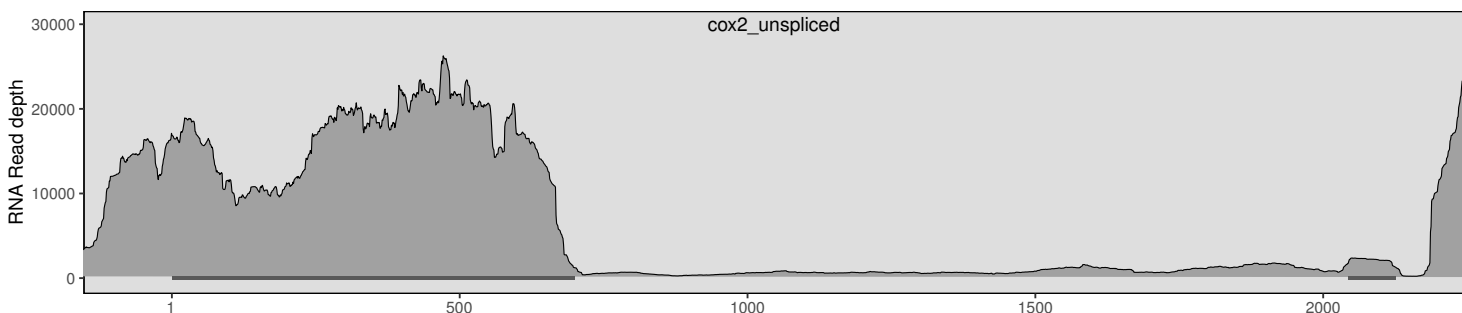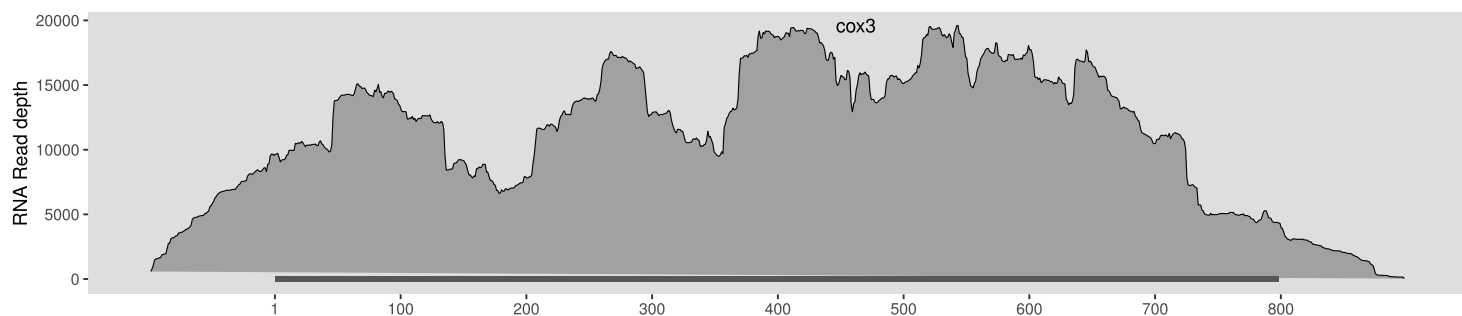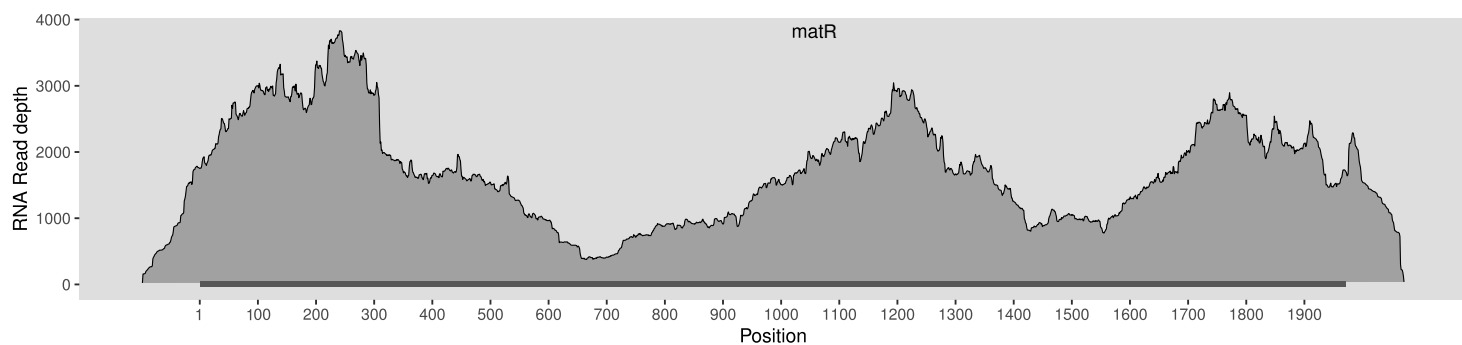

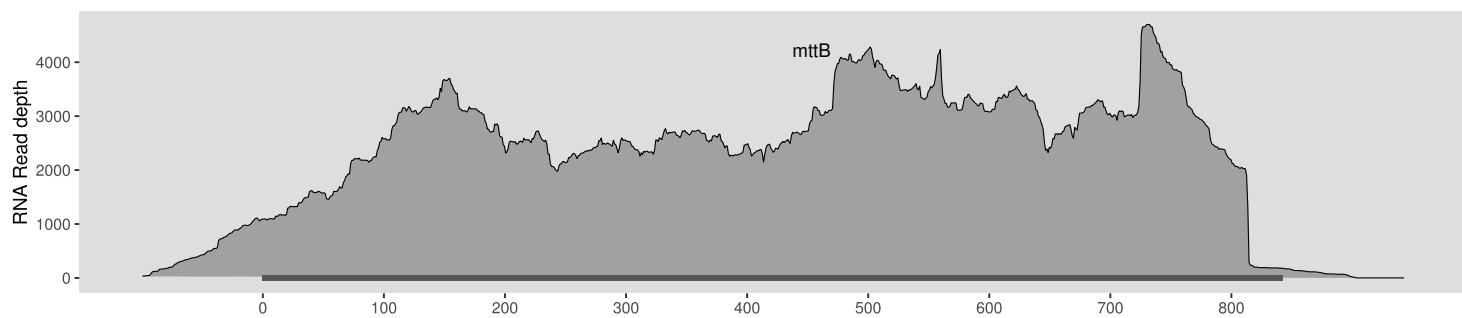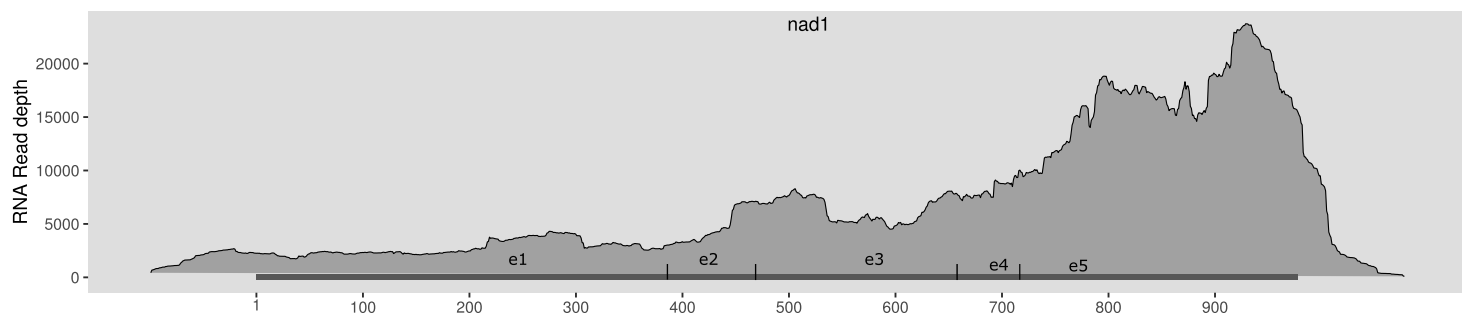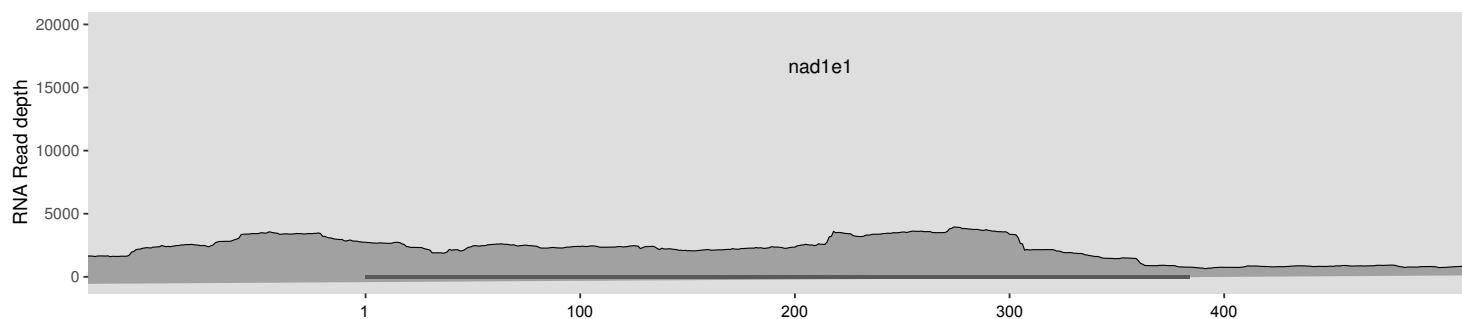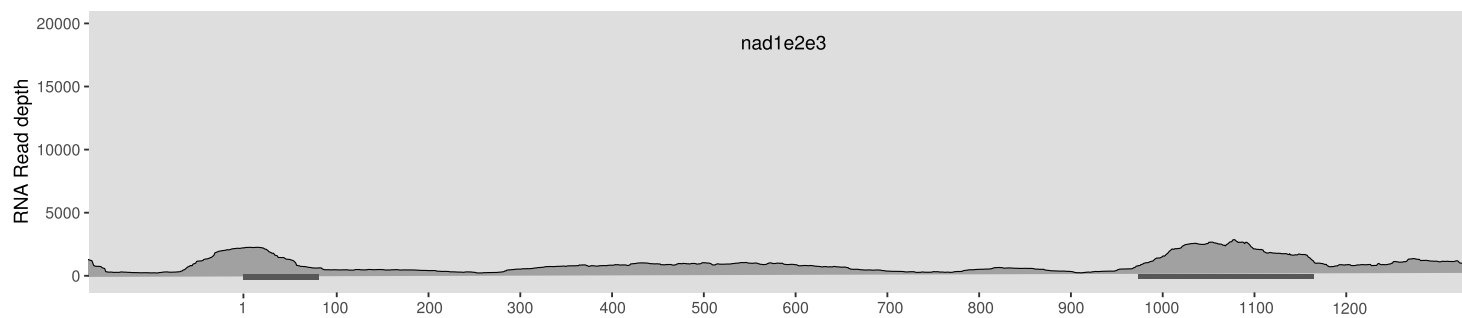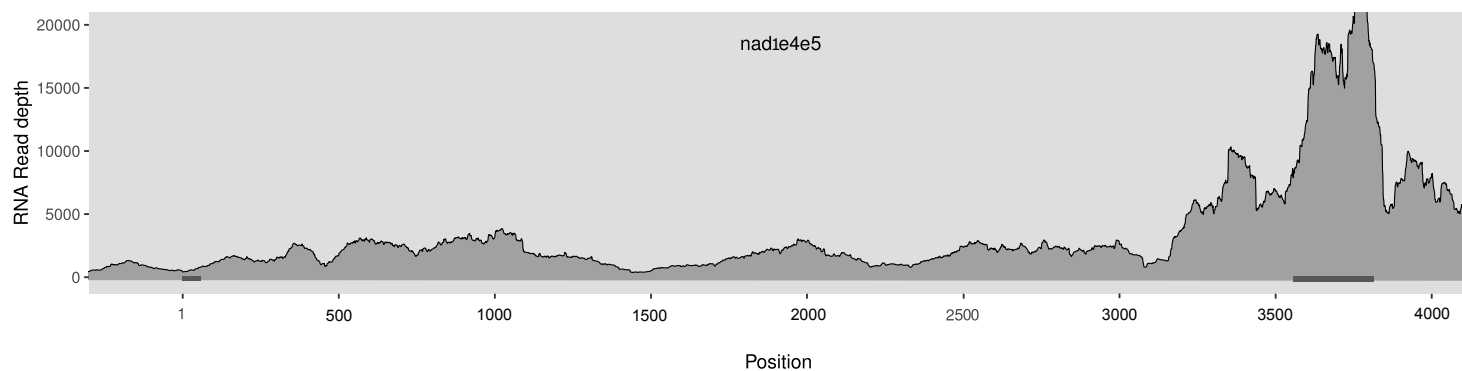

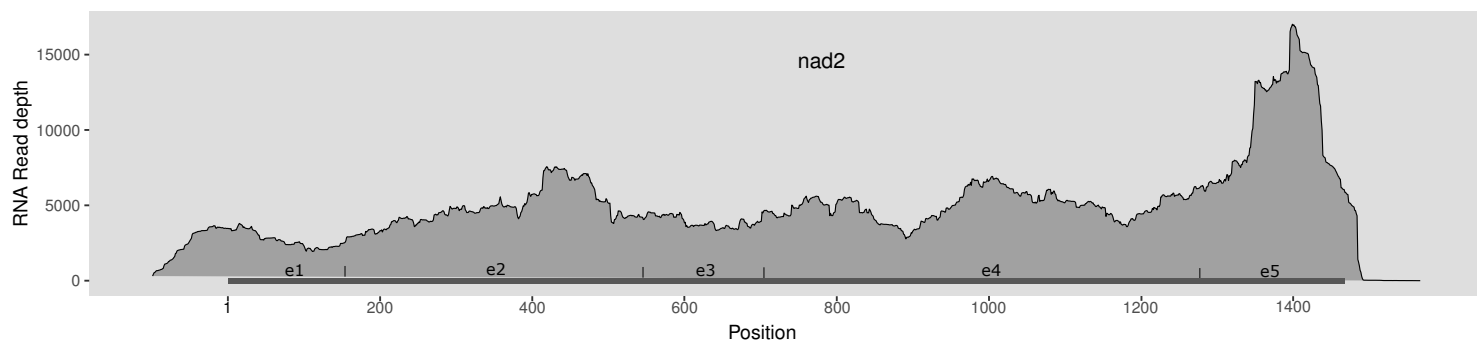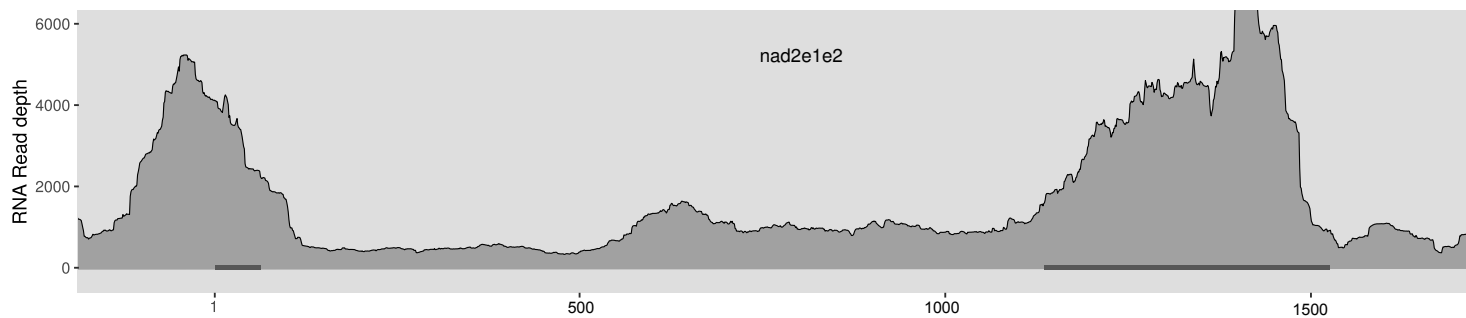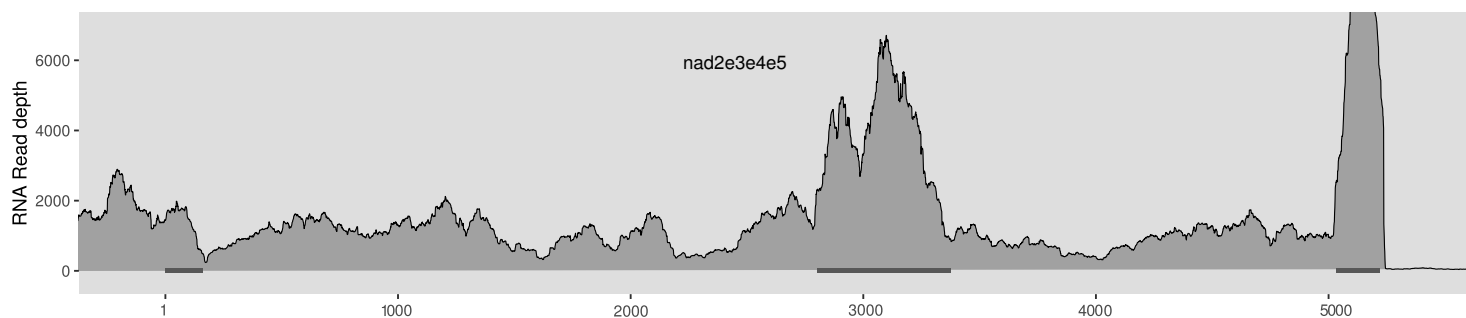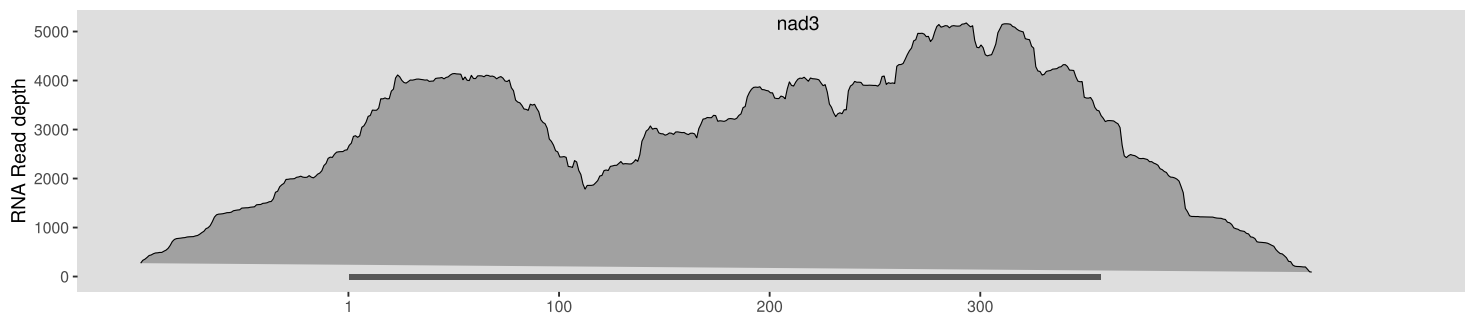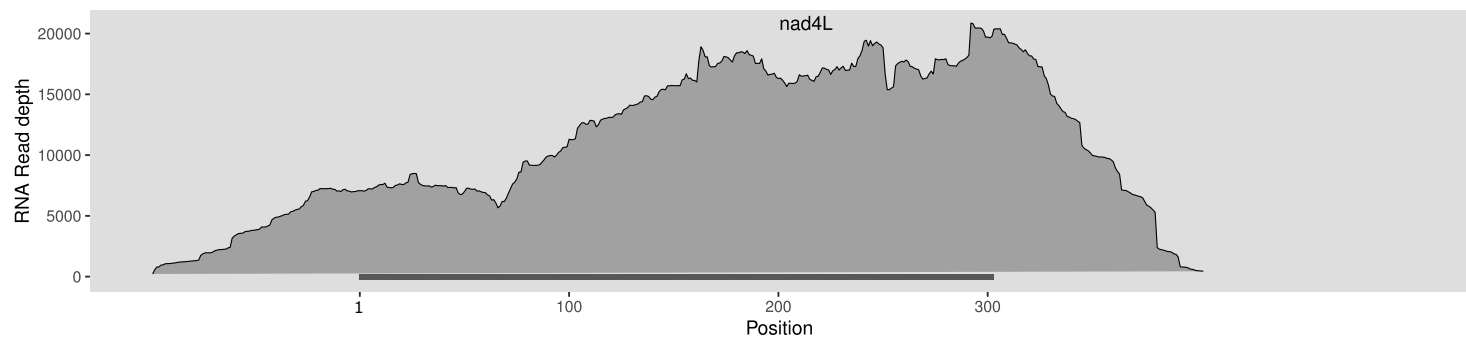

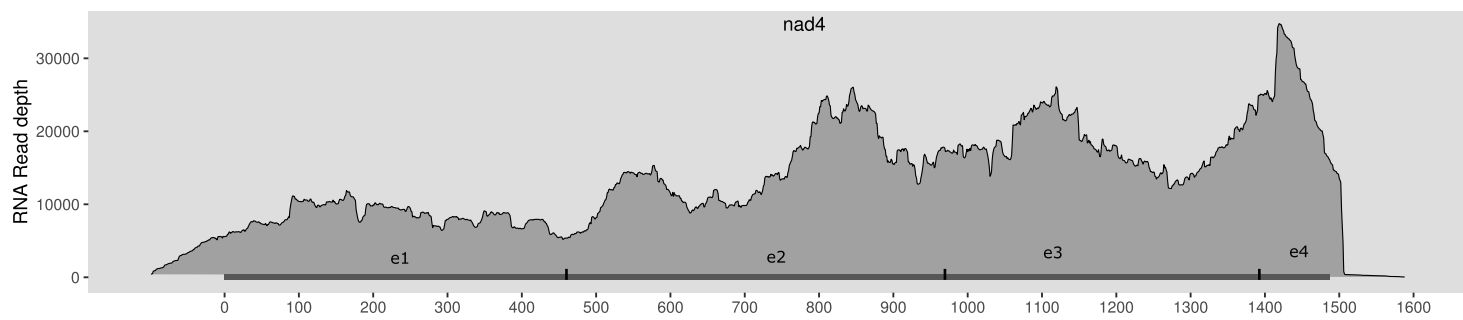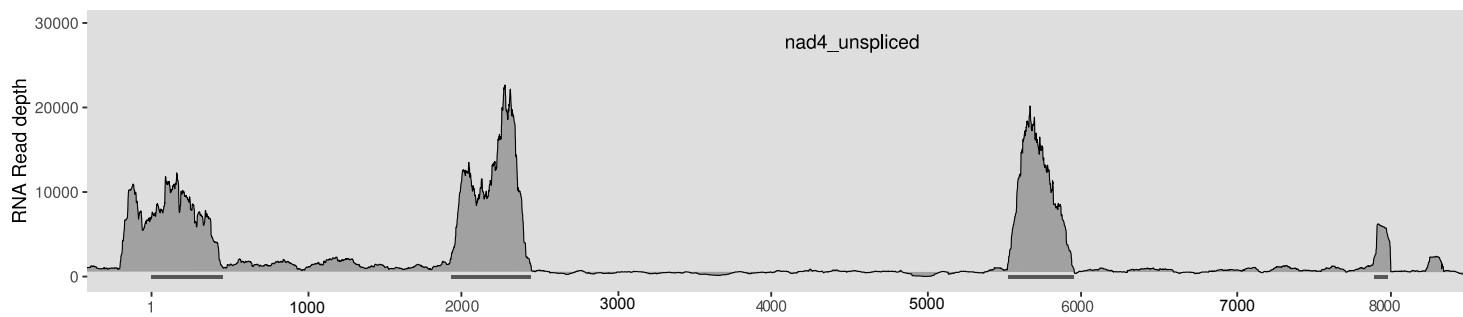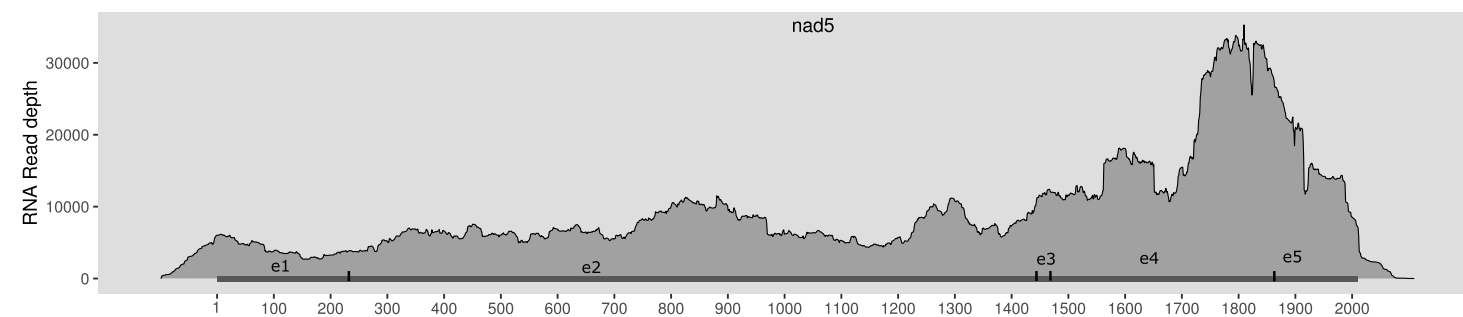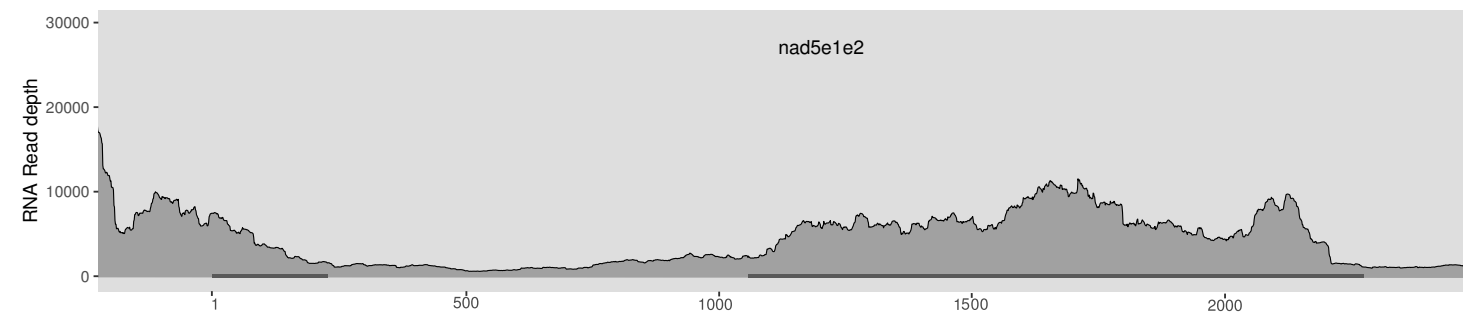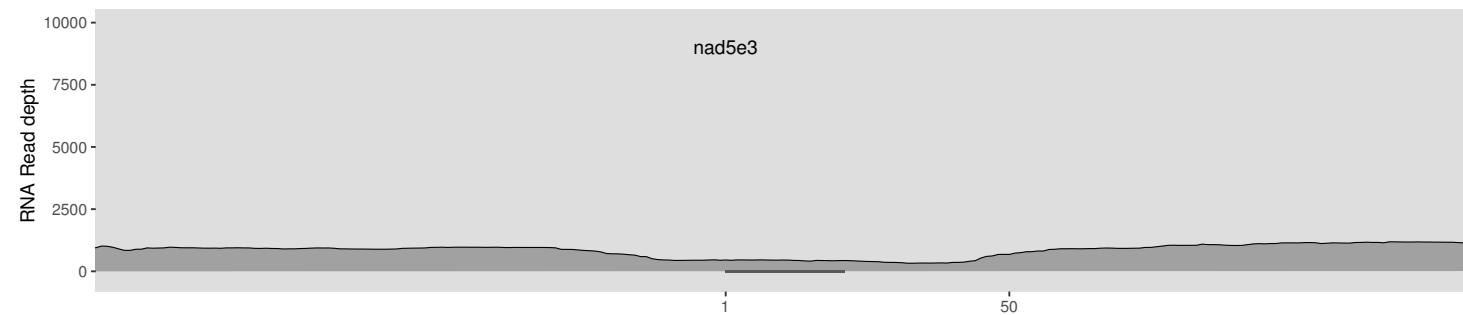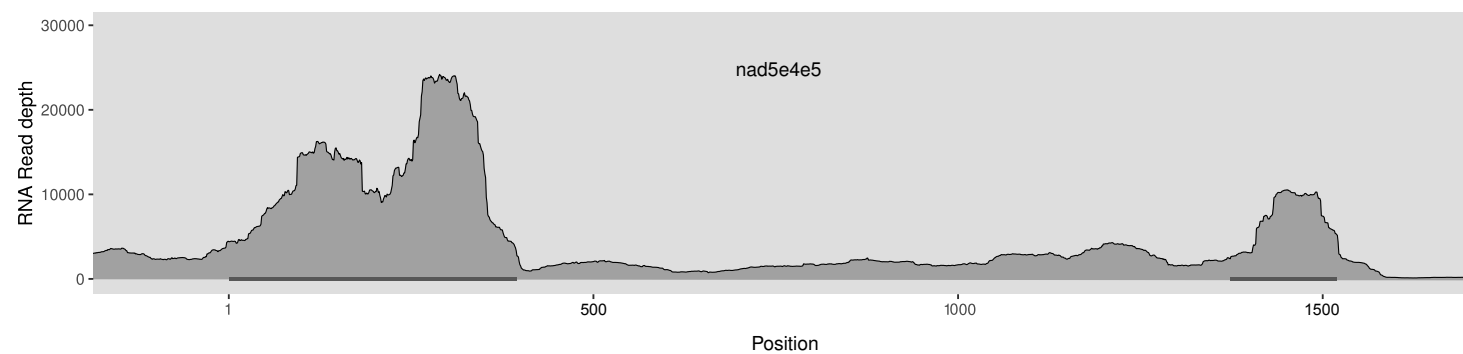

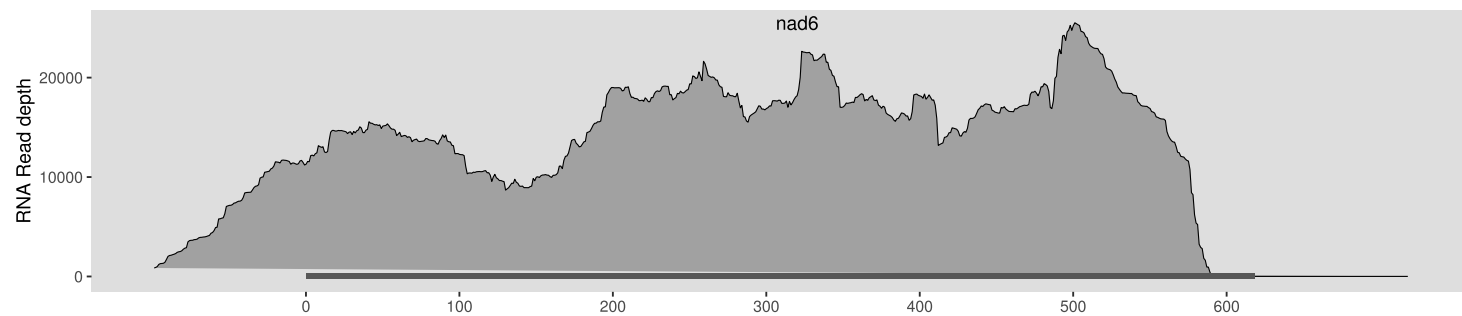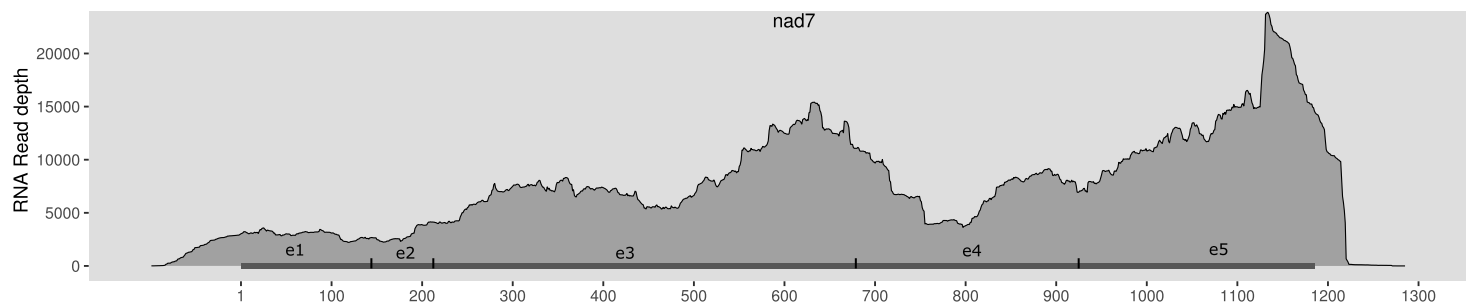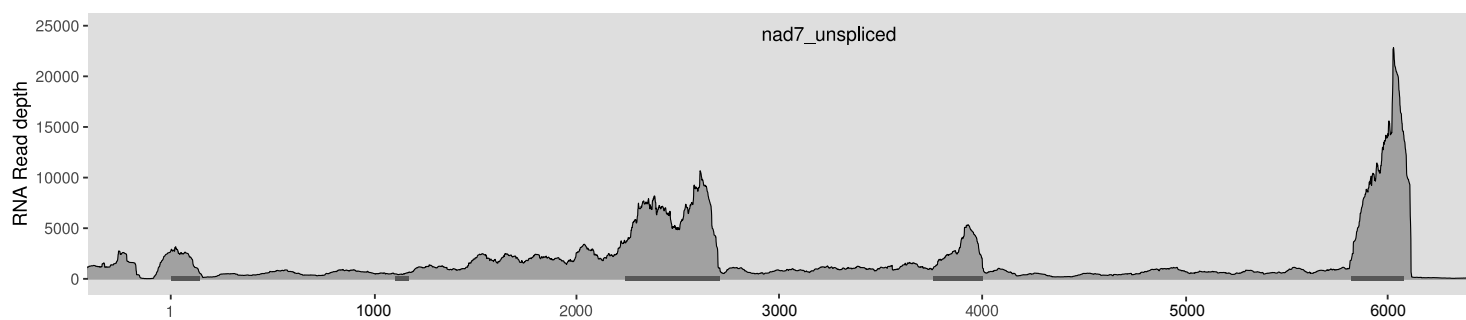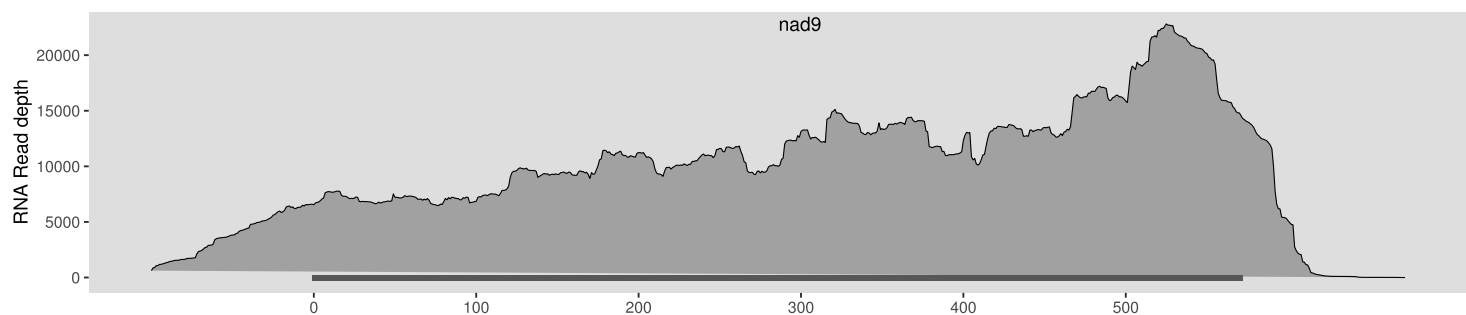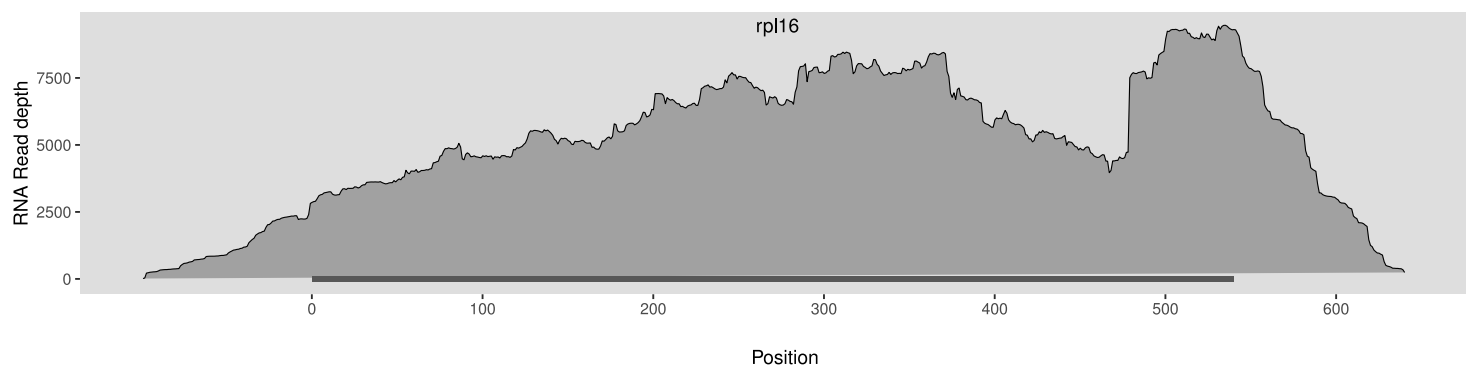

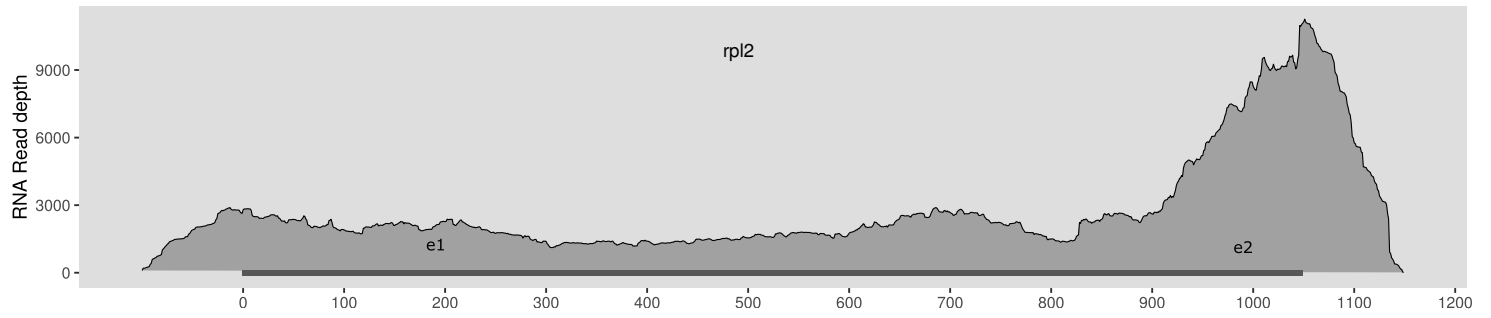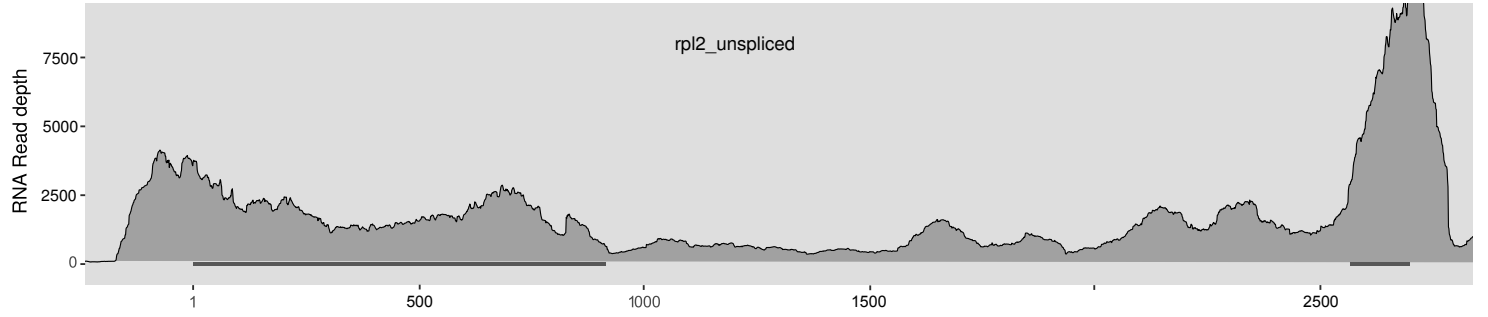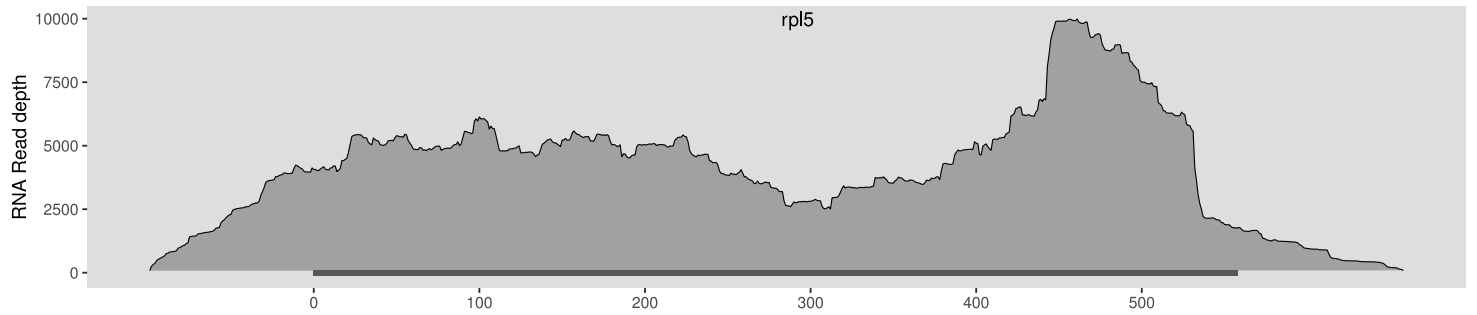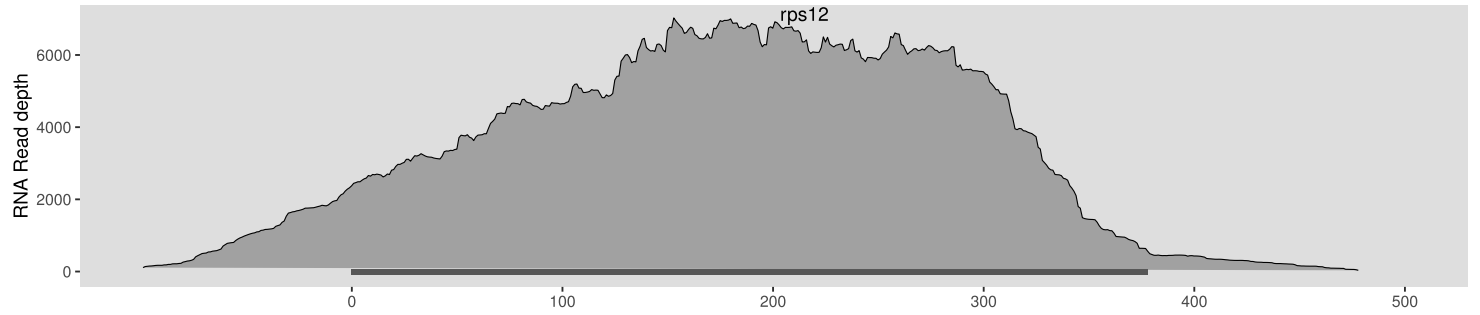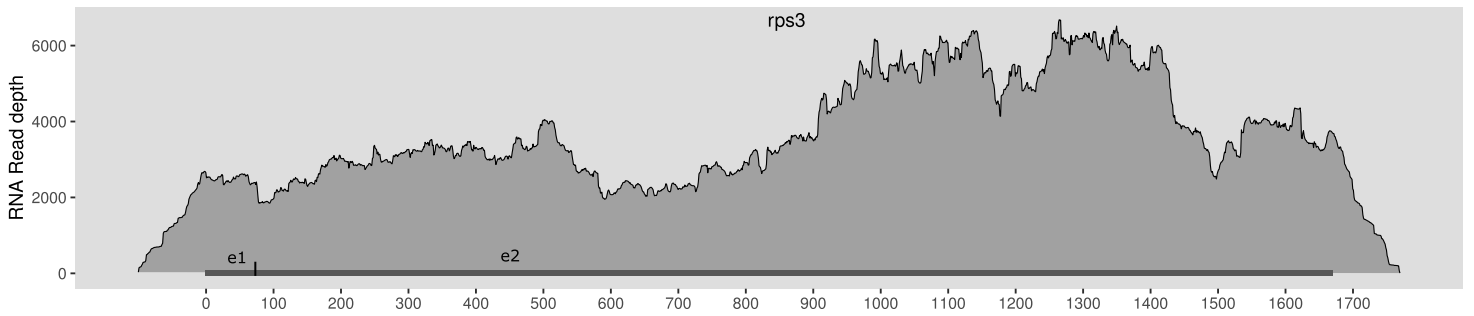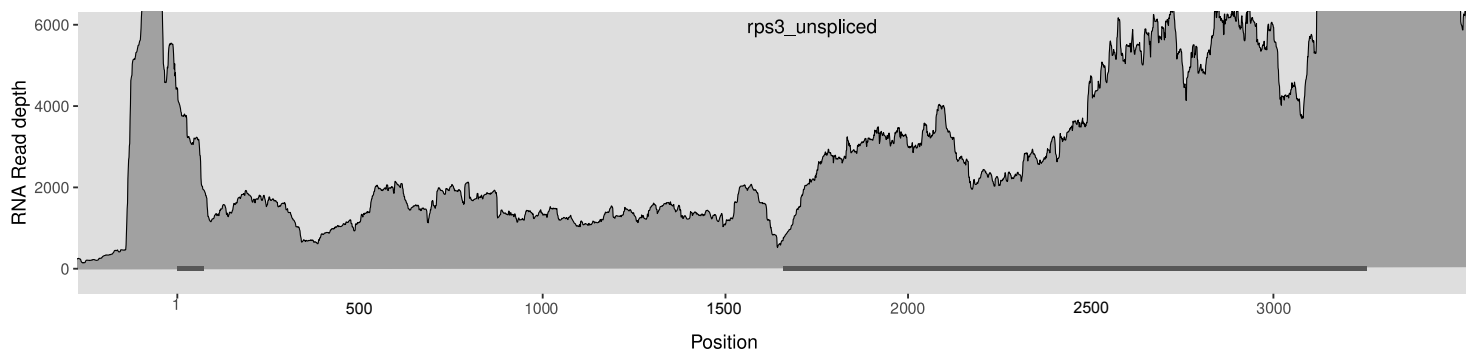



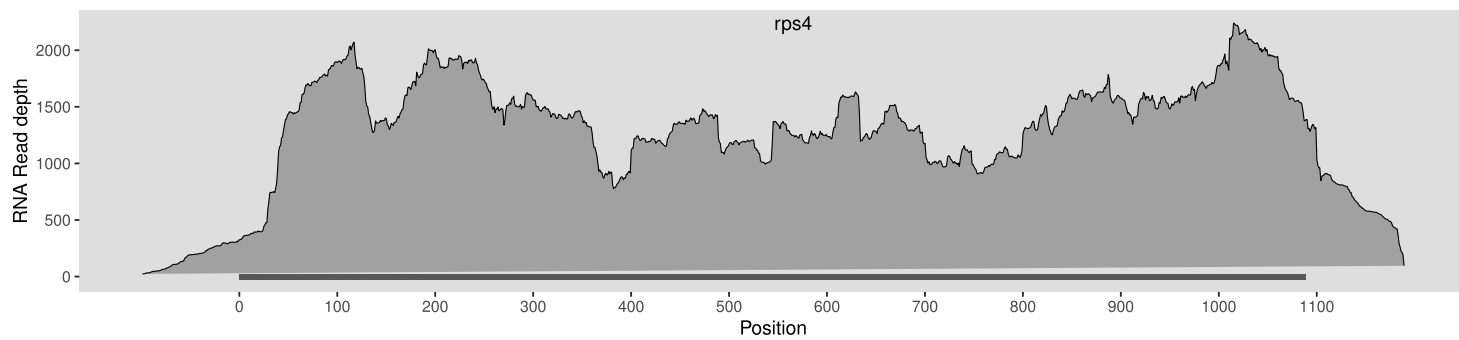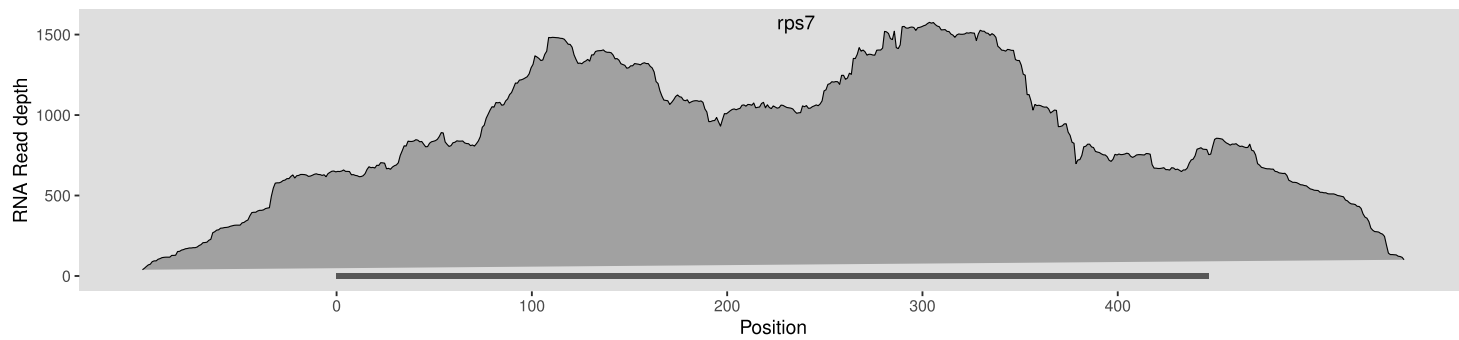

Supplement: s1 [file s1]
