# Supplementary material for: Transcriptional Landscape and Splicing Efficiency in Arabidopsis Mitochondria
Source: MDPI journal article supplement (doi:10.3390/cells10082054), 2021-08-11

**Fig. S5.** RNA read depth of protein-coding genes located at a distance < 2 kb in the *Arabidopsis* mtDNA based on the combined data sets of the three biological samples. Gray bars represent genes and dark gray bars are exons. Green and red squares represent the start of transcription sites and 3' termini, respectively, which were identified experimentally [36,42,44]. The start of transcription for nad5e4e5 has not been experimentally identified. Below each graph, the mtDNA coordinates of the strand in which the genes are located are shown.

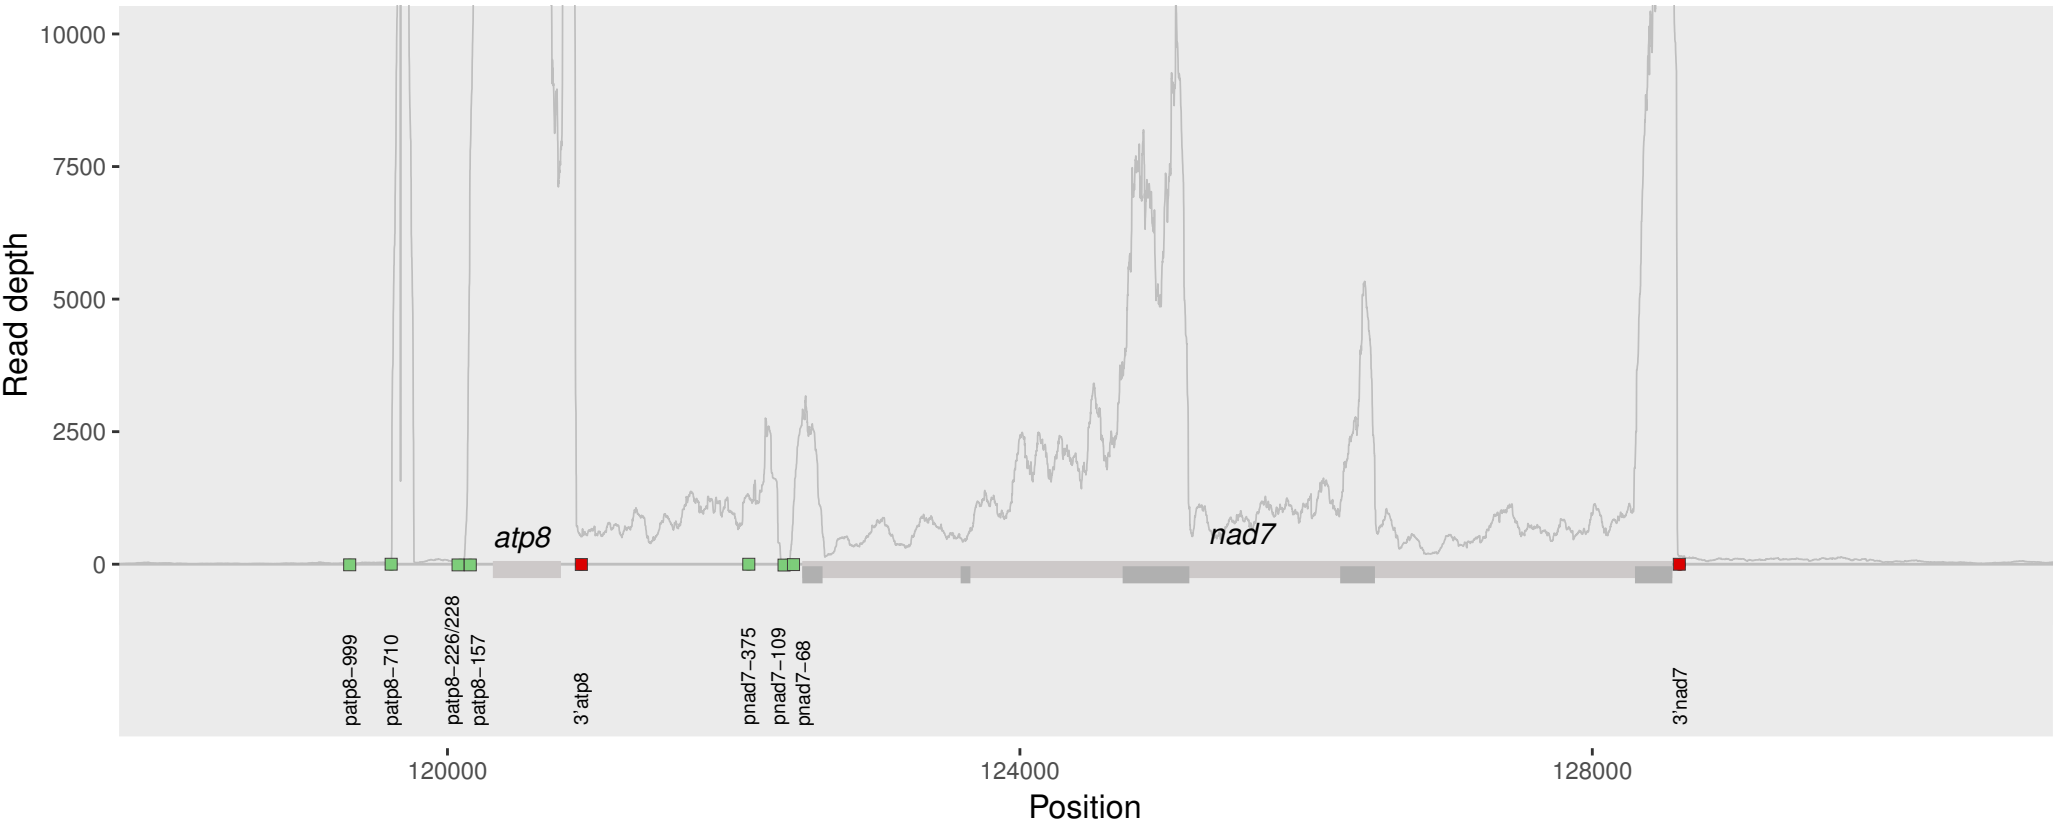

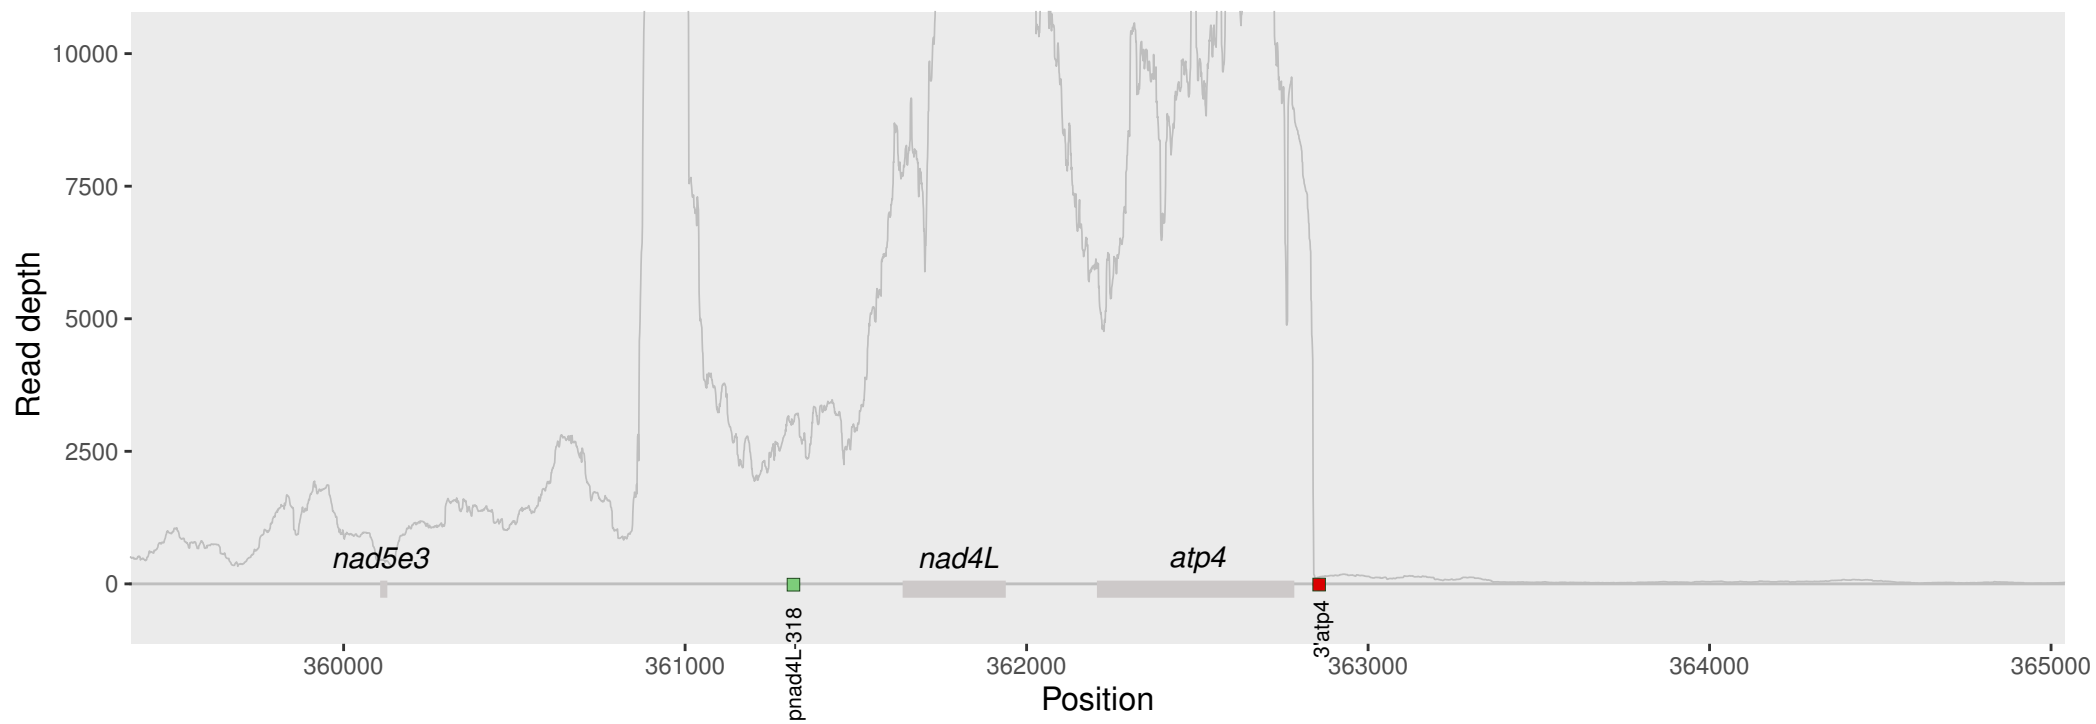

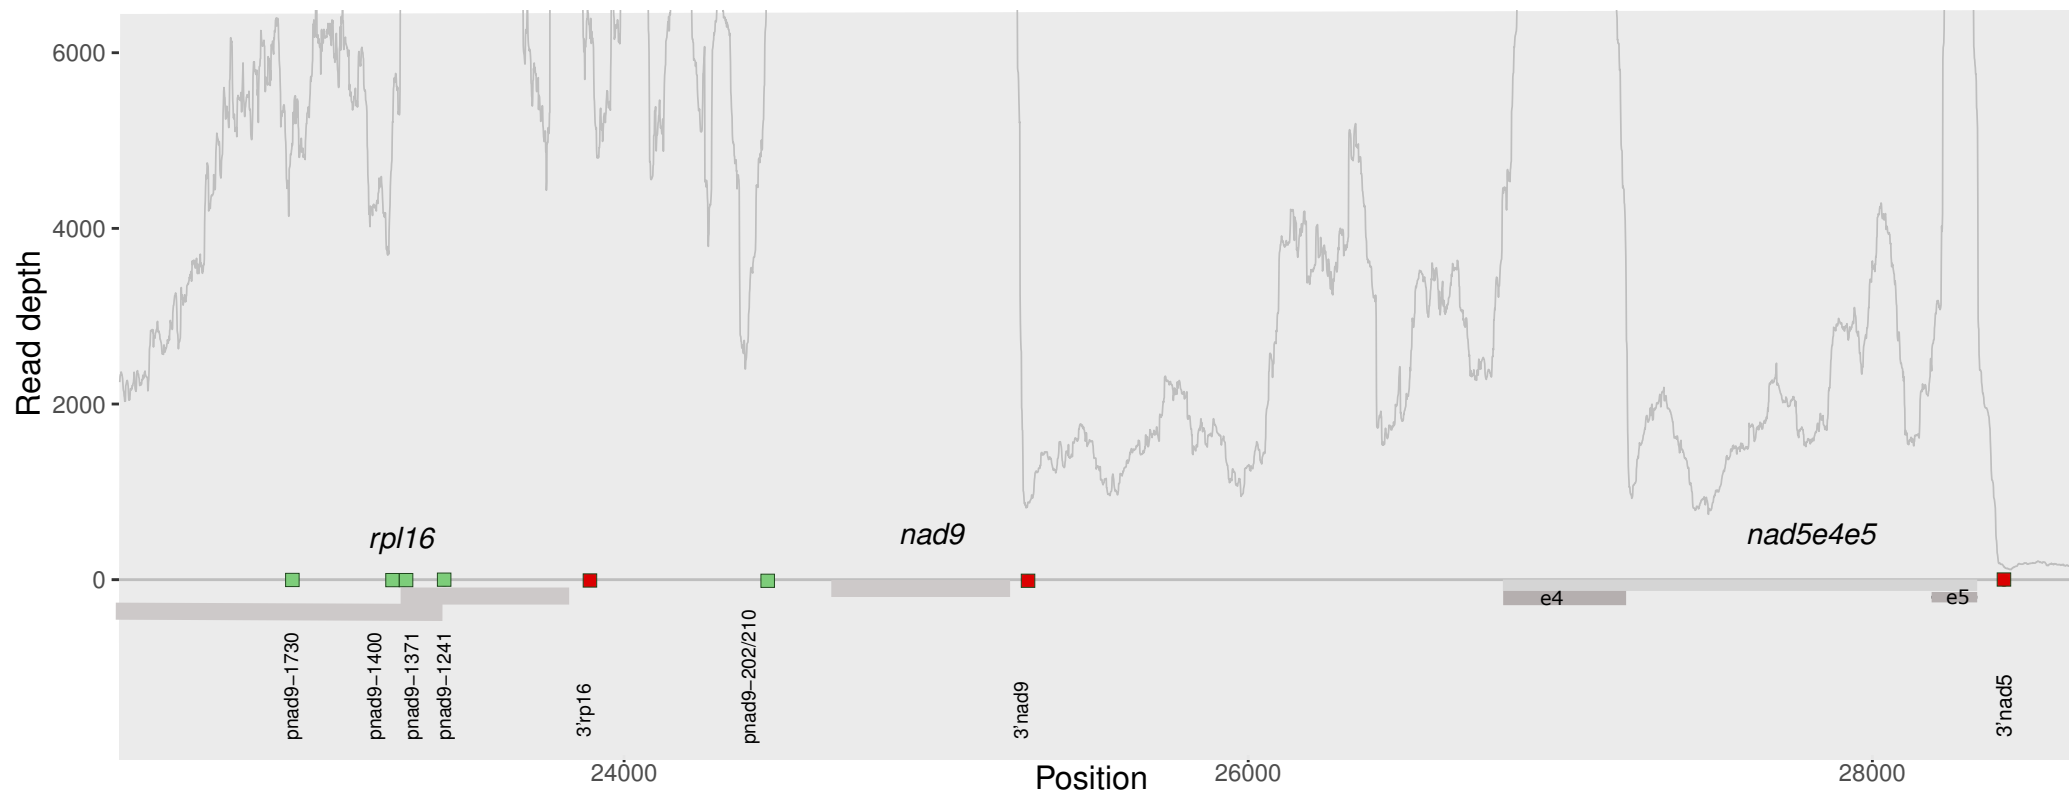

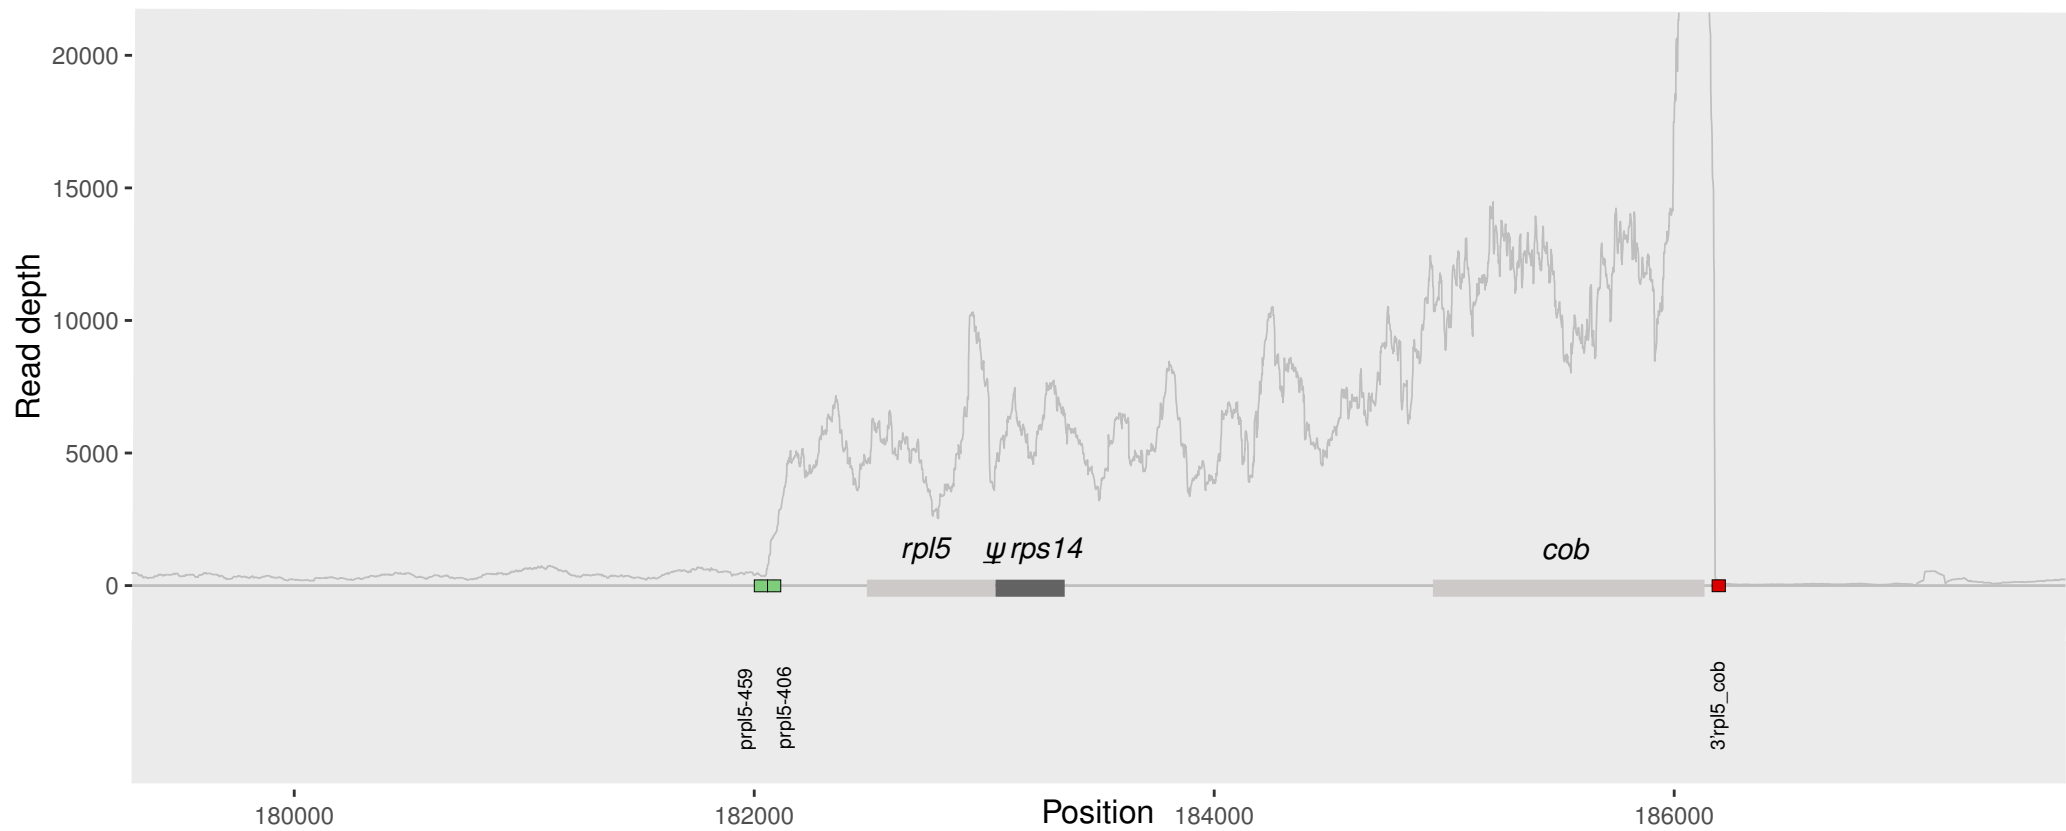

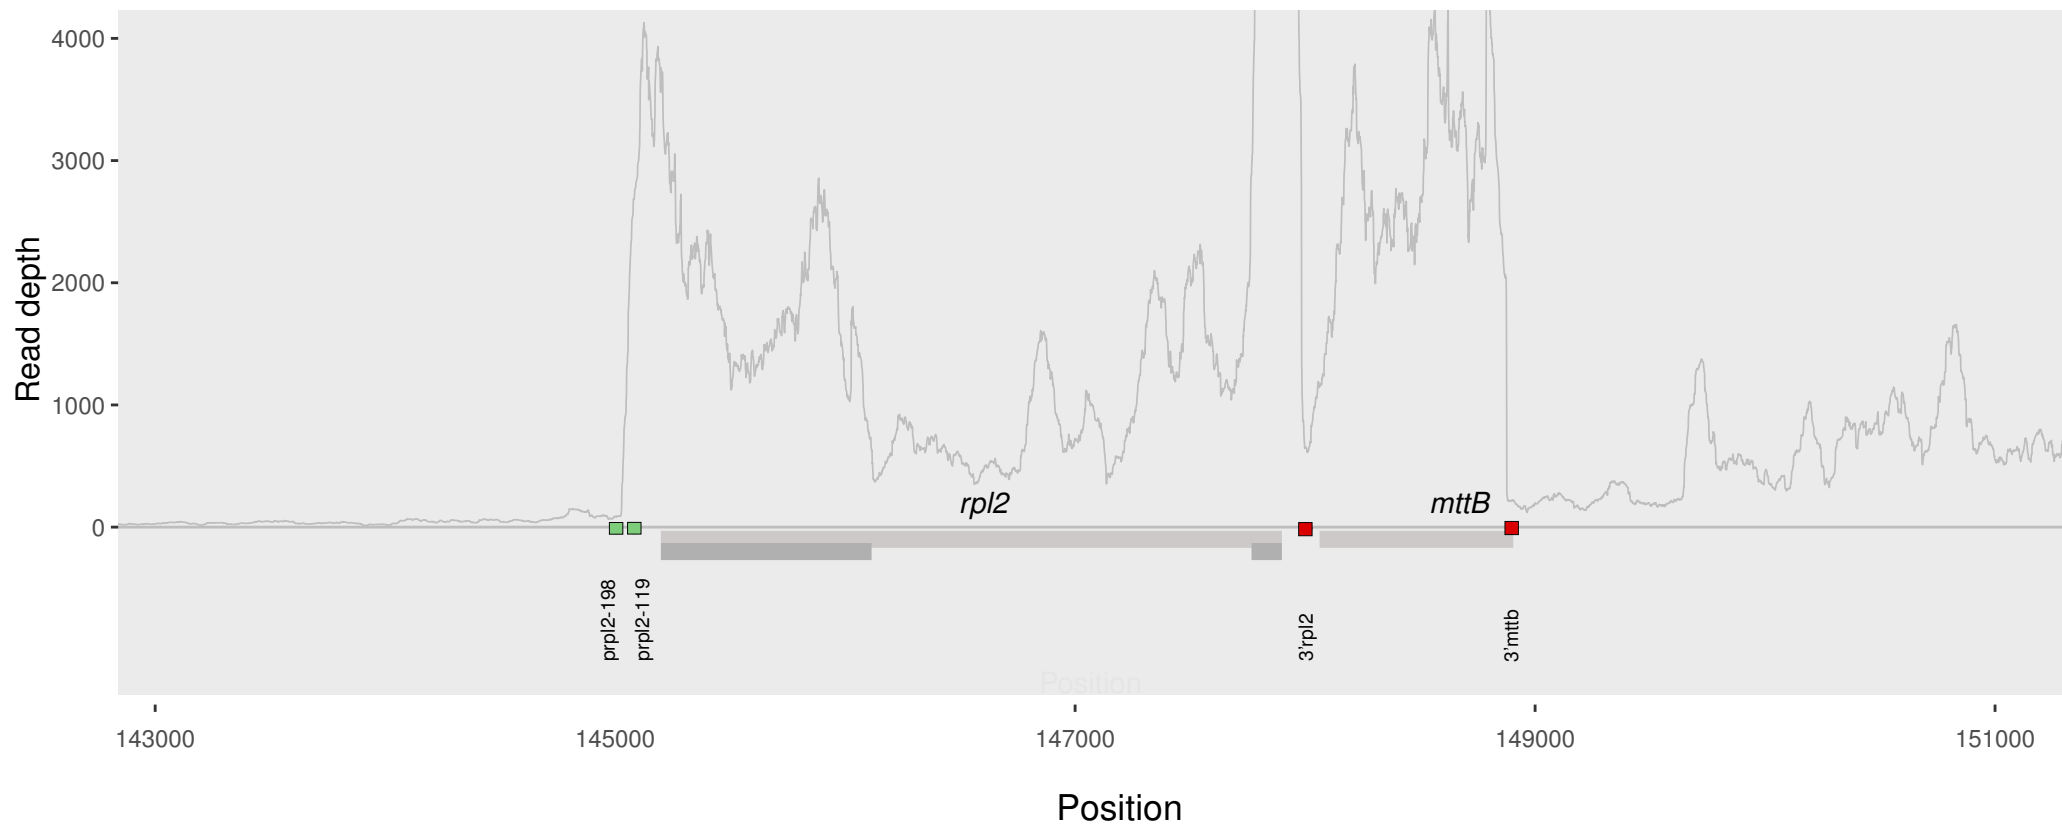

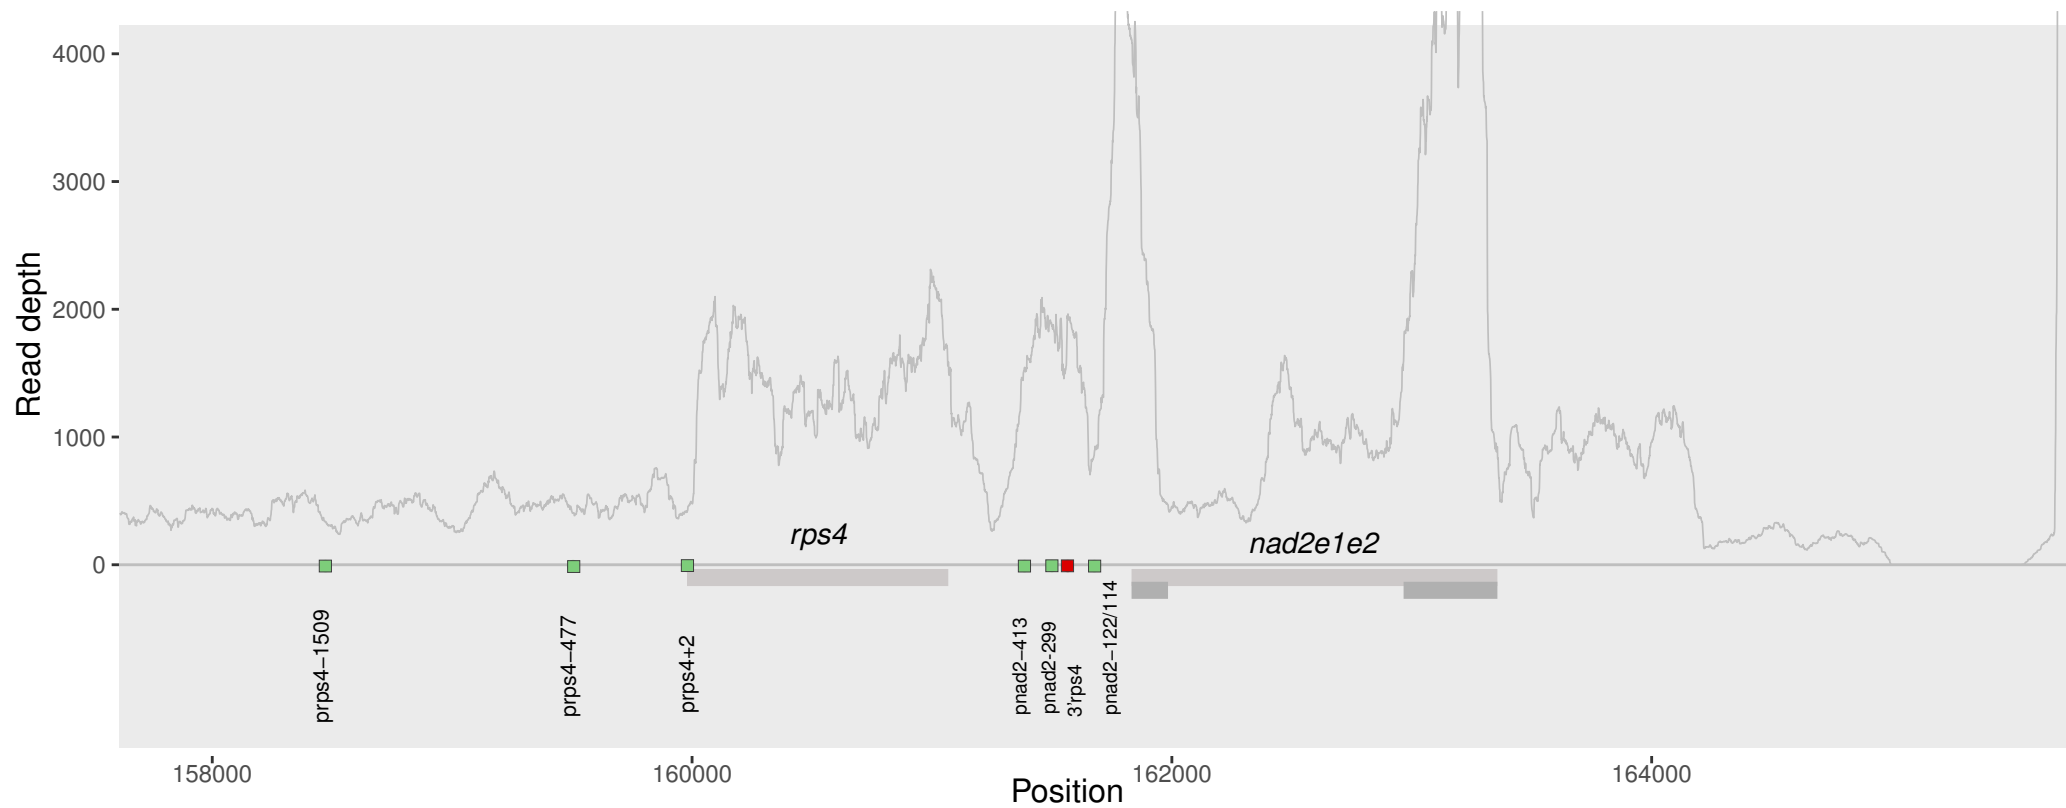

Supplement: s1 [file s1]
