# Supplementary material for: Transcriptional Landscape and Splicing Efficiency in Arabidopsis Mitochondria
Source: MDPI journal article supplement (doi:10.3390/cells10082054), 2021-08-11

**Fig.S2.** The frequency distribution of RNAseq read depth calculated based on 100-bp windows across both strands of the entire *Arabidopsis* mitochondrial genome.

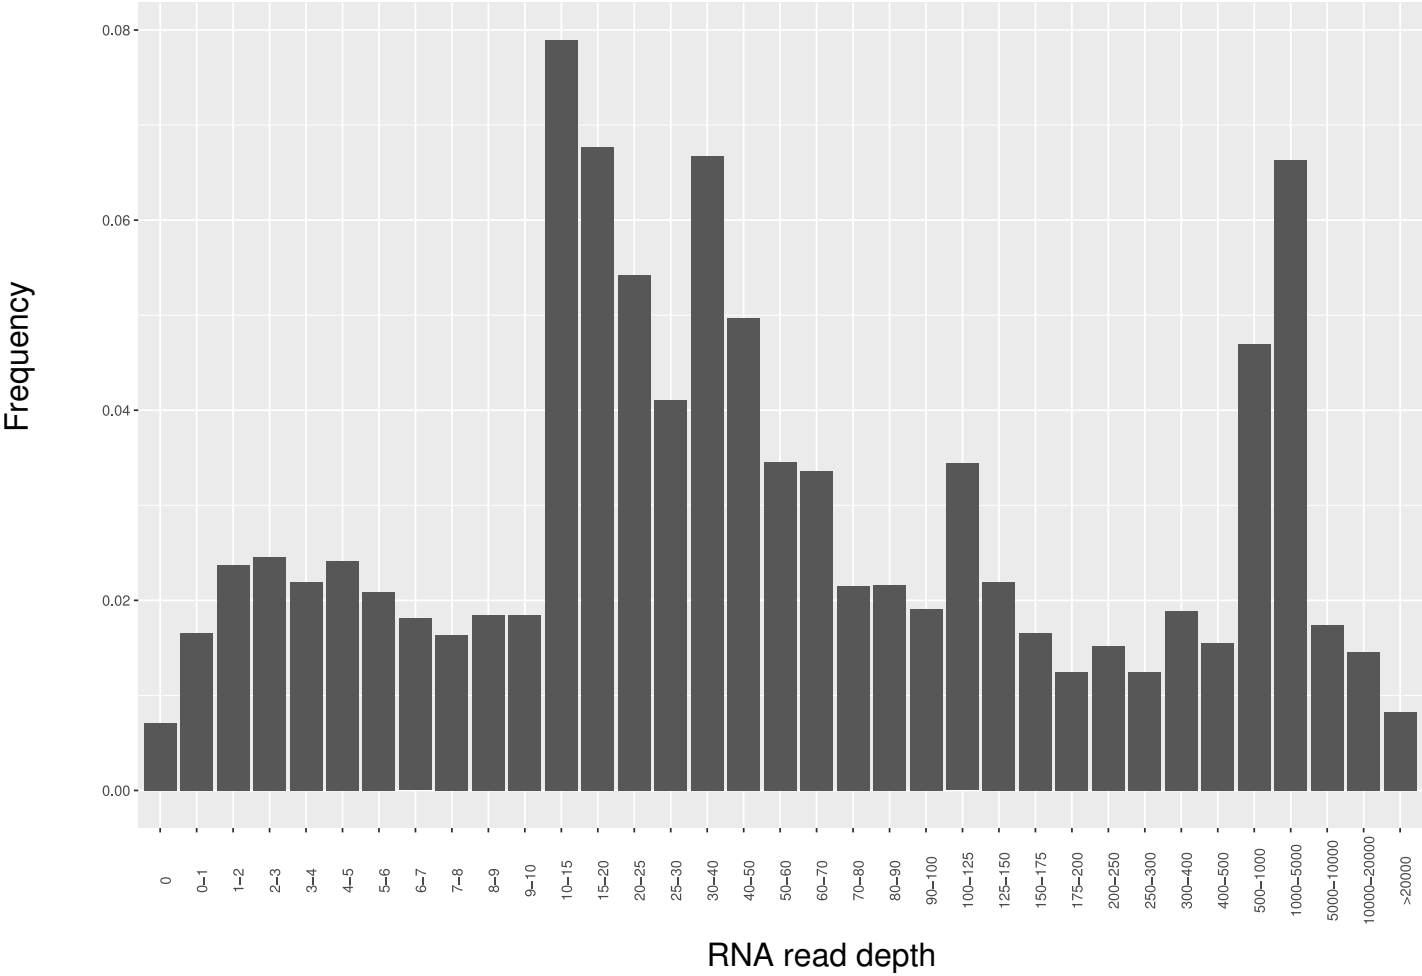

Supplement: s1 [file s1]
