# Supplementary material for: Transcriptional Landscape and Splicing Efficiency in Arabidopsis Mitochondria
Source: Cells. 2021 Aug 11;10(8):2054. doi: 10.3390/cells10082054 (PMC8392254; doi:10.3390/cells10082054)
Supplement: Supplementary file 1 [file cells-10-02054-s001.zip]

Archive with 6 entries (6 files):
- FigS1.pdf
- FigS2.pdf
- FigS3.pdf
- FigS4.pdf
- FigS5.pdf
- SuppTables.xls
