# Supplementary material for: Transcriptional Landscape and Splicing Efficiency in Arabidopsis Mitochondria
Source: Cells. 2021 Aug 11;10(8):2054. doi: 10.3390/cells10082054 (PMC8392254; doi:10.3390/cells10082054)
Supplement: Supplementary file 1 [file cells-10-02054-s001.zip › SuppTables.xls]

## Sheet: Table S1
Table S1. Average RNA read depth and RPKM of the CDS of all protein-coding genes in Arabidopsis mtDNA.
Functional categories	Gene name	CDS length	Average read depth based on the three data sets combined	RPKMa			Average RPKM of the three runs	Standard error
				ERR1665215	ERR1665219	ERR1665220
Respiratory Complex V	atp1	1524	31272.7	100577	99583.9	105028	101729	1673.85
	atp4	579	9243.68	32157.4	28377.4	29668.5	30067.8	1109.29
	atp6-1	1158	11258.1	40833.9	40016.2	40618.8	40489.6	252.448
	atp6-2	1050	5600.61	34665.8	35227.6	34366.3	34753.2	244.724
	atp8	477	22525.9	73671.4	71933.1	74213.9	73272.8	687.903
	atp9	225	112556	367336	369150	361785	366090	2215.34
Cytochrome c maturation system	ccmB	621	1629.07	5398.35	5382.6	5113.68	5298.21	92.3773
	ccmC	771	1543.89	5109.2	5084.21	4870.43	5021.28	75.7704
	ccmFc	1329	3687.51	12133.2	11801	12049.4	11994.5	99.7498
	ccmFn1	1149	180.488	608.44	521.56	631.78	587.26	33.5327
	ccmFn2	612	370.693	1402.19	983.92	1232.21	1206.1	121.447
Respiratory Complex III	cob	1182	13159.6	41230.5	44957.7	42208.4	42798.9	1115.74
Respiratory Complex IV	cox1	1584	17470.5	57464.4	56014.3	57001.2	56826.6	427.618
	cox2	783	19281.7	61061.3	64426	62654.3	62713.9	971.754
	cox3	798	13115.9	41292.1	43751.5	42937.9	42660.5	723.394
Maturase	matR	1971	1742.95	5754.27	5240.74	6016.84	5670.62	227.913
Transport protein	mttB	843	2727.53	8784.08	8933.1	8897.69	8871.62	44.9505
Respiratory Complex I	nad1	978	7694.22	25690.3	24219.8	25173.9	25028	430.726
	nad2	1467	5291.1	16714.9	17556.1	17358.7	17209.9	253.969
	nad3	357	3722.17	11701	12275.2	12345.4	12107.2	204.091
	nad4	1488	14406.2	47735.3	47654.8	45169.1	46853.1	842.289
	nad4L	303	13698.8	46170.8	44491	42999.1	44553.6	916.134
	nad5	2010	9898.27	32508.4	32328.9	32090.9	32194.2	230.323
	nad6	618	15265.3	49999.2	50430	48516.5	49648.6	579.536
	nad7	1185	8249.74	27515.6	26250.7	26735.7	26834	368.452
	nad9	573	11947.1	38702	39752.1	38115.2	38856.4	478.811
Ribosomal proteins	rpl2	1050	2607.59	8777.8	7877.51	8794.11	8483.14	302.853
	rpl5	558	5048.34	16067	17211	15976.8	16418.3	397.229
	rpl16	540	6154.81	19793.3	19794.6	20474.3	20020.7	226.776
	rps3	1671	3801.79	12720.7	11983.6	12395	12366.5	213.265
	rps4	1089	1419.01	4576.8	4634.76	4635.09	4615.55	19.3736
	rps7	447	1088.38	3911.82	3129.56	3580.91	3540.77	226.71
	rps12	378	4745.56	14622.6	15340.5	16350.5	15437.9	501.16
a RPKM stands for Reads Per Kilobase of transcript per Million mapped reads.

## Sheet: Table  S2
Table S2. Transcription start sites and 3' ends identified experimentally for protein-coding sequences in Arabidopsis mitochondria.
Genea	Name of promoterb	Transcription start location in the Arabidopsis mtDNA	3' end location in the Arabidopsis mtDNA	Location of the start codon of the gene or co-transcribed unit in the Arabidopsis mtDNA	Location of the stop codon of the gene or co-transcribed unit in the Arabidopsis mtDNA	References c
atp1				68621	67098
	Patp1-1947	70567				Kühn et al. 2005 [44]
	Patp1-1898	70518				Kühn et al. 2005 [44]
	Patp1-361	68982				Forner et al. 2007 [36]
	Patp1-267	68888				Forner et al. 2007 [36]
	Patp1-124	68745				Forner et al. 2007 [36]
			66938			Forner et al. 2007 [36]
atp6-1				49423	50580
	Patp6-1-916/-913	48,510/48,510				Kühn et al 2005 [44]
	Patp6-1-200	49223				Forner et al. 2007 [36]; Kühn et al. 2005 [44]
	Patp6-1-156	49267				Kühn et al. 2005 [44]
			50625			Forner et al. 2007 [36]
atp6-2				265516	264467
	Patp6-2-507	266203				Kühn et al 2005 [44]
	Patp6-2-436	266132				Kühn et al 2005 [44]
	Patp6-2-148	265844				Kühn et al 2005 [44]
	Patp6-2-268	265784				Forner et al. 2007 [36]
			264422			Forner et al. 2007 [36]
atp8				247492	247016
	Patp8-999	248491				Kühn et al 2005 [44]
	Patp8-710	248202				Kühn et al 2005 [44]
	Patp8-226/228	247,720/247,718				Forner et al. 2007 [36]; Kühn et al. 2005 [44]
	Patp8-157	247649				Forner et al. 2007 [36]; Kühn et al. 2005 [44]
			246895			Forner et al. 2007 [36]
atp9				271185	270961
	Patp9-652	271870				Kühn et al 2005 [44]
	Patp9-487	271705				Kühn et al 2005 [44]
	Patp9-295	271512				Kühn et al 2005 [44]
	Patp9-239	271457				Kühn et al 2005 [44]
	Patp9-84	271302				Forner et al. 2007 [36]
			270781			Forner et al. 2007 [36]
ccmB				18434	17814
	PccmB-347	18781				Forner et al. 2007 [36]
	PccmB-140	18574				Forner et al. 2007 [36]
			17734			Forner et al. 2007 [36]
ccmC				308298	309068
	PccmC-1834	306464				Kühn et al 2009 [42]
	PccmC-1817	306481				Kühn et al 2009 [42]
	PccmC-1677	306621				Kühn et al 2009 [42]
	PccmC-1634	306664				Kühn et al 2009 [42]
	PccmC-1159	307139				Kühn et al 2009 [42]
	PccmC- 487/-484	307,811/307,814				Kühn et al. 2009 [42]; Forner et al. 2007 [36]
	PccmC- 45	308253				Kühn et al 2009 [42]
			309023			Forner et al. 2007 [36]
ccmFc				189483	191770
	PccmFc-743	188740				Kühn et al 2009 [42]
	PccmFc-379	189104				Kühn et al 2009 [42]
	PccmFc-124	189359				Forner et al. 2007 [36], Kühn et al 2009 [42]
			191915			Forner et al. 2007 [36]
ccmFn1				316013	317161
	PccmFn1-149	315863				Forner et al. 2007 [36]
	PccmFn1-66	315946				Forner et al. 2007 [36]
			317628			Forner et al. 2007 [36]
ccmFn2				291580	292191
	PccmFn2-57	291523				Forner et al. 2007 [36]
	PccmFn2-35	291545				Forner et al. 2007 [36]
			292361			Forner et al. 2007 [36]
cox1				116345	114762
	Pcox1-355	116700				Kühn et al 2005 [44]
	Pcox1-241	116586				Forner et al. 2007 [36]
	Pcox1-88	116433				Kühn et al 2009 [42]
			114715			Forner et al. 2007 [36]
cox2				6264	8389
	Pcox2-683	5581				Kühn et al. 2005 [44]
	Pcox2-481	5783				Kühn et al. 2005 [44]
	Pcox2-210/205	6059				Kuhn et al. 2005 [44]; Forner et al. 2007 [36]
	Pcox2-151	6113				Forner et al. 2007 [36]
			8705			Forner et al. 2007 [36]
cox3				330773	329976
	Pcox3-378	331153				Forner et al. 2007 [36]
			329662			Forner et al. 2007 [36]
nad1e1				83321	82935
	Pnad1e1-645	83966				Forner et al. 2007 [36]
	Pnad1e1-355	83676				Forner et al. 2007 [36]
	Pnad1e1-149	83470				Forner et al. 2007 [36]
nad1e4e5				230304	234132
	Pnad1e4-892	229411				Kühn et al 2009 [42]
	Pnad1e4-838	229466				Kühn et al 2009 [42]
	Pnad1e4-775	229531				Kühn et al 2009 [42]
	Pnad1e4-275	230028				Kühn et al 2009 [42]
			234221			Forner et al. 2007 [36]
nad2e1e2				161832	163357
	Pnad2e1-413	161386				Kühn et al 2009 [42]
	Pnad2e1-299	161500				Kühn et al 2009 [42]
	Pnad2e1-122/114	161677				Forner et al. 2007 [36]; Kühn et al. 2009 [42]
			92,784 (nad2e3e4e5)			Forner et al. 2007 [36]
nad3-rps12				288044	288823
	Pnad3-229	287812				Forner et al. 2007 [36]
			288838			Forner et al. 2007 [36]
nad4				215562	207580
	Pnad4-228	215790				Forner et al. 2007 [36]
			207550			Forner et al. 2007 [36]
Nad4L-atp4				361637	362784
	Pnad4L-318	361319				Forner et al. 2007 [36]
			362856			Forner et al. 2007 [36]
nad5e1				234352	236628
	Pnad5e1-72	234281				Forner et al. 2007 [36]
	Pnad5e1-21	234331				Forner et al. 2007 [36]
			28,422 (nad5e4e5)			Forner et al. 2007 [36]
nad6				165838	166455
	Pnad6-401	165437				Kühn et al 2009 [42]
	Pnad6-333	165505				Kühn et al 2009 [42]
	Pnad6-179	165659				Forner et al. 2007 [36]; Kühn et al 2009 [42]
	Pnad6-143	165695				Kühn et al 2009 [42]
	Pnad6-88	165750				Kühn et al 2009 [42]
			166439			Forner et al. 2007 [36]
nad7				245330	239250
	Pnad7-375	245706				Forner et al. 2007 [36]
	Pnad7-109	245439				Forner et al. 2007 [36]
	Pnad7-68	245398				Forner et al. 2007 [36]
			239198			Forner et al. 2007 [36]
nad9				24665	25237
	Pnad9-1730	22933				Kühn et al. 2009 [42]
	nad9-1400	23264				Kühn et al. 2009 [42]
	Pnad9-1371	23294				Kühn et al. 2009 [42]
	Pnad9-1241	23424				Kühn et al. 2009 [42]
	Pnad9-202/210	24457				Forner et al. 2007 [36] /Kühn et al. 2009 [42]
			25292			Forner et al. 2007 [36]
rpl2-mttB				222610	218904
	Prpl2-198	222805				Forner et al. 2007 [36]
	Prpl2-119	222725				Forner et al. 2007 [36]
			218912			Forner et al. 2007 [36]
			219,803 (rpl2)			Forner et al. 2007 [36]
rpl5-cob				185319	181677
	Prpl5-459	185779				Forner et al. 2007 [36]
	Prpl5-406	185725				Forner et al. 2007 [36]
			181619			Forner et al. 2007 [36]
rps3-rpl16				20165	23824
	Prps3-1133	19032				Kühn et al. 2005 [44]
	Prps3-1053	19112				Kühn et al. 2005 [44]
	Prps3-163	20002				Forner et al. 2007 [36]
			23891			Forner et al. 2007 [36]
rps4				159980	161068
	Prps4-1509	158472				Kühn et al 2009 [42]
	Prps4-477	159504				Kühn et al 2009 [42]
	Prps4+2	159982				Forner et al. 2007 [36]
			161566			Forner et al. 2007 [36]
rps7				79559	80005
	Prps7-448	79111				Forner et al. 2007 [36]
			80357			Forner et al. 2007 [36]
a Genes not listed are those for which the start of transcription has not been experimentally identified.
b The number indicates the position of the promoter with respect to the start of the coding sequence as stated in the cited studies.
c References:
Forner J, Weber B, Thuss S, Wildum S, Binder S. 2007. Mapping of mitochondrial mRNA termini in Arabidopsis thaliana: t-elements contribute to 5’ and 3’ end formation. Nucleic acids research 35: 3676–3692.
Kühn, K.; Weihe, A.; Börner, T. Multiple Promoters Are a Common Feature of Mitochondrial Genes in Arabidopsis. Nucleic Acids Res 2005, 33, 337–346, doi:10.1093/nar/gki179.
Kühn K, Richter U, Meyer EH, Delannoy E, de Longevialle AF, O’Toole N, Börner T, Millar AH, Small ID, Whelan J. 2009. Phage-type RNA polymerase RPOTmp performs gene-specific transcription in mitochondria of Arabidopsis thaliana. The Plant cell 21: 2762–2779

## Sheet: Table S3
Table S3. Splicing efficiency of introns in the Arabidopsis mtDNA calculated using reads mapped to exon-intron versus exon-exon junctions based on individual RNAseq data sets of the three biological samples.
Intron a	Cis or trans splicing	Splicing mechanism b	biosample SAMEA4475146 (run ERR1665220)					biosample SAMEA4475145 (run ERR1665219)					biosample SAMEA4475141 (run ERR1665215)
			EI5'c	I3'Ed	EEe	I3'E/EI5'	Splicing efficiency (SE)	EI5'c	I3'Ed	EEe	I3'E/EI5'	Splicing efficiency (SE)	EI5'c	I3'Ed	EEe	I3'E/EI5'	Splicing efficiency (SE)
ccmFci	Cis-splicing	Branching pathway	75	111	392	1.48	0.81	57	122	396	2.14035	0.82	60	123	361	2.05	0.8
cox2i	Cis-splicing	Branching pathway	52	98	4121	1.88462	0.98	31	105	4424	3.3871	0.98	46	79	3888	1.71739	0.98
nad1i1	Trans-splicing	Hydrolytic pathway	65	416	313	6.4	0.57	51	362	317	7.09804	0.61	64	419	314	6.54688	0.57
nad1i2	Cis-splicing	Hydrolytic pathway	50	55	794	1.1	0.94	39	47	772	1.20513	0.95	62	72	756	1.16129	0.92
nad1i3	Trans-splicing	Both pathways were reported	62	307	1079	4.95161	0.85	46	288	1002	6.26087	0.86	79	350	1129	4.43038	0.84
nad1i4	Cis-splicing	Branching pathway	81	455	626	5.61728	0.7	65	382	644	5.87692	0.74	94	443	712	4.71277	0.73
nad2i1	Cis-splicing	Hydrolytic pathway	53	147	317	2.77358	0.76	34	145	315	4.26471	0.78	54	145	287	2.68519	0.74
nad2i2	Trans-splicing	Branching pathway	25	174	704	6.96	0.88	18	126	655	7	0.9	11	176	599	16	0.86
nad2i3	Cis-splicing	Branching pathway	27	199	495	7.37037	0.81	11	187	523	17	0.84	21	195	453	9.28571	0.81
nad2i4	Cis-splicing	Branching pathway	133	145	900	1.09023	0.87	116	165	921	1.42241	0.87	140	150	867	1.07143	0.86
nad4i1	Cis-splicing	Both pathways were reported	163	218	789	1.33742	0.81	156	203	851	1.30128	0.83	161	212	852	1.31677	0.82
nad4i2	Cis-splicing	Hydrolytic pathway	47	46	2253	0.978723	0.98	36	44	2442	1.22222	0.98	61	35	2229	0.57377	0.98
nad4i3	Cis-splicing	Branching pathway	52	154	2596	2.96154	0.96	54	166	2857	3.07407	0.96	57	148	2949	2.59649	0.97
nad5i1	Cis-splicing	Branching pathway	113	276	433	2.44248	0.69	84	261	511	3.10714	0.75	81	280	508	3.45679	0.74
nad5i4	Cis-splicing	Branching pathway	61	342	626	5.60656	0.96	51	337	5781	6.60784	0.97	77	352	5683	4.57143	0.96
nad7i1	Cis-splicing	Hydrolytic pathway	35	37	209	1.05714	0.85	20	40	188	2	0.86	20	58	242	2.9	0.86
nad7i2	Cis-splicing	Branching pathway	60	457	360	7.61667	0.58	46	461	388	10.0217	0.6	71	461	421	6.49296	0.61
nad7i3	Cis-splicing	Branching pathway	33	120	1366	3.63636	0.95	34	85	1351	2.5	0.96	37	127	1284	3.43243	0.94
nad7i4	Cis-intron	Branching pathway	91	102	873	1.12088	0.9	51	103	888	2.01961	0.92	67	99	924	1.47761	0.92
rpl2i	Cis-splicing	Both pathways were reported	44	254	141	5.77273	0.49	34	196	156	5.76471	0.58	44	235	168	5.34091	0.55
rps3i	Cis-splicing	Branching pathway	171	76	271	0.444444	0.69	139	66	223	0.47482	0.69	186	69	240	0.370968	0.65
a The trans-splicing introns nad5i2 and nad5i3 were not analyzed because the nad5 exon 3 is too short.
b Information taken from Gualberto et al. 2015 [18].
c number of reads that support the conformation exon-5’intron.
d number of reads that support the conformation 3’intron-exon.
e number of reads that support the conformation exon-exon.
